# Supplementary material
Source: PubMed Central journal article supplement (PMC5820967)
Supplement: IAI.00798-17_zii999092332s1.pdf [file IAI.00798-17_zii999092332s1.pdf]

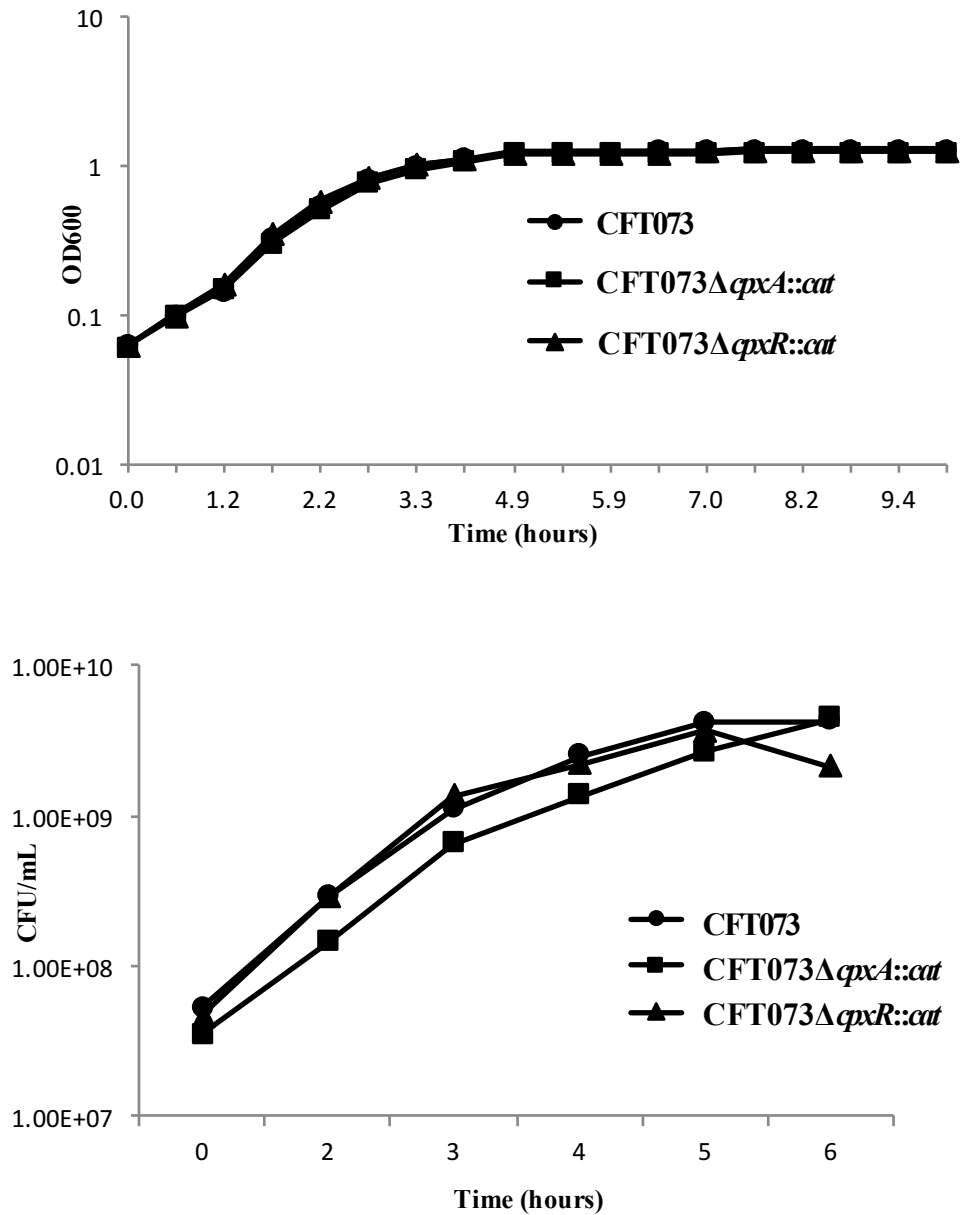

**FIG S1** Growth kinetics of CFT073, CFT073Δ*cpxA*::*cat*, and CFT073Δ*cpxR*::*cat* in TB broth with 0.4% glucose determined by measuring the optical density at 600 nm (OD<sub>600</sub>) (top panel) and CFU/mL (bottom panel) at different time points following inoculation from overnight cultures.

**Table S1** Functional classification of genes differentially regulated between the parent, the *cpxA* mutant, and the *cpxR* mutant

| Locus tag                                                             | Gene          | Description                                  | <i>cpxA</i> mutant vs <i>cpxR</i> mutant <sup>a</sup> | <i>cpxA</i> mutant vs parent <sup>b</sup> | <i>cpxR</i> mutant vs parent <sup>c</sup> |
|-----------------------------------------------------------------------|---------------|----------------------------------------------|-------------------------------------------------------|-------------------------------------------|-------------------------------------------|
| <b>CELLULAR PROCESSES AND SIGNALING</b>                               |               |                                              |                                                       |                                           |                                           |
| <b>Cell cycle control, cell division, and chromosome partitioning</b> |               |                                              |                                                       |                                           |                                           |
| c0715                                                                 | <i>ccrB</i>   | Camphor resistance protein                   | -2.00                                                 |                                           |                                           |
| c0171                                                                 | <i>ecpD</i>   | Chaperone protein EcpD                       | 2.48                                                  | 2.80                                      |                                           |
| c0172                                                                 | <i>yadN</i>   | Fimbrial-like protein YadN                   | 4.53                                                  | 5.11                                      |                                           |
| c3163                                                                 |               | Tail component of prophage                   | 2.07                                                  |                                           |                                           |
| <b>Adhesins, chaperones, secretion, and trafficking</b>               |               |                                              |                                                       |                                           |                                           |
| c1239                                                                 | <i>focA</i>   | F1C major fimbrial subunit                   | -5.32                                                 | -4.68                                     |                                           |
| c1238                                                                 | <i>sfaB</i>   | F1C and S fimbrial switch regulatory protein | -4.64                                                 | -4.23                                     |                                           |
| c1240                                                                 | <i>sfaD</i>   | F1C minor fimbrial subunit                   | -4.91                                                 | -4.20                                     |                                           |
| c1241                                                                 | <i>focC</i>   | F1C periplasmic chaperone                    | -4.62                                                 | -3.89                                     |                                           |
| c1242                                                                 | <i>focD</i>   | F1C fimbrial usher                           | -3.61                                                 | -2.88                                     |                                           |
| c1243                                                                 | <i>focF</i>   | F1C minor fimbrial subunit F                 | -3.82                                                 | -3.25                                     |                                           |
| c1244                                                                 | <i>focG</i>   | F1C minor fimbrial subunit protein G         | -4.63                                                 | -3.92                                     |                                           |
| c1245                                                                 | <i>focH</i>   | F1C fimbrial adhesin                         | -4.19                                                 | -3.69                                     |                                           |
| c3592                                                                 | <i>papA</i>   | PapA protein                                 | -3.71                                                 | -3.34                                     |                                           |
| c3593                                                                 | <i>papI</i>   | PapI protein                                 | -3.34                                                 | -2.53                                     |                                           |
| c4214                                                                 |               | Major fimbrial subunit                       | -2.07                                                 | -2.19                                     |                                           |
| c5188                                                                 | <i>papA_2</i> | PapA protein                                 | -3.50                                                 | -3.06                                     |                                           |
| c5393                                                                 | <i>fimA</i>   | Type-1 fimbrial protein A chain              | -4.49                                                 | -3.75                                     |                                           |
| c5394                                                                 | <i>fimI</i>   | Fimbrin-like protein FimI                    | -3.90                                                 | -3.13                                     |                                           |
| c5395                                                                 | <i>fimC</i>   | Chaperone protein FimC                       | -3.40                                                 | -2.68                                     |                                           |
| c5396                                                                 | <i>fimD</i>   | Outer membrane usher protein FimD            | -2.99                                                 | -2.12                                     |                                           |
| c5397                                                                 | <i>fimF</i>   | FimF protein                                 | -2.18                                                 |                                           |                                           |
| c5399                                                                 | <i>fimG</i>   | FimG protein                                 | -2.31                                                 |                                           |                                           |
| c5400                                                                 | <i>fimH</i>   | FimH protein                                 | -2.39                                                 | -2.02                                     |                                           |
| c2143                                                                 | <i>spy</i>    | Spheroplast protein Y precursor              | 4.42                                                  | 4.38                                      |                                           |
| c3740                                                                 | <i>exbD</i>   | Biopolymer transport protein ExbD            | 3.78                                                  | 3.42                                      |                                           |

| <b>Locus tag</b>                              | <b>Gene</b> | <b>Description</b>                                             | <b><i>cpxA</i> mutant vs <i>cpxR</i> mutant<sup>a</sup></b> | <b><i>cpxA</i> mutant vs parent<sup>b</sup></b> | <b><i>cpxR</i> mutant vs parent<sup>c</sup></b> |
|-----------------------------------------------|-------------|----------------------------------------------------------------|-------------------------------------------------------------|-------------------------------------------------|-------------------------------------------------|
| c3741                                         | <i>exbB</i> | Biopolymer transport protein ExbB                              | 3.72                                                        | 3.56                                            |                                                 |
| c4865                                         | <i>cpxP</i> | Periplasmic repressor CpxP                                     | 5.22                                                        | 4.45                                            |                                                 |
| <b>Cell wall/membrane/envelope biogenesis</b> |             |                                                                |                                                             |                                                 |                                                 |
| c0388                                         | <i>phoE</i> | Outer membrane phosphoprotein E                                | -4.42                                                       | -2.67                                           |                                                 |
| c0426                                         | <i>upaB</i> | Putative autotransporter                                       | -2.40                                                       | -2.21                                           |                                                 |
| c0652                                         | <i>ompT</i> | Outer membrane protease                                        | -4.18                                                       | -3.63                                           |                                                 |
| c0658                                         | <i>cusC</i> | Copper/silver efflux system outer membrane protein             | -7.35                                                       | -5.88                                           |                                                 |
| c0660                                         | <i>cusB</i> | Copper/silver efflux system membrane fusion protein            | -4.41                                                       | -3.79                                           |                                                 |
| c0924                                         | <i>dacC</i> | D-alanyl-D-alanine carboxypeptidase fraction C                 | -3.67                                                       | -3.92                                           |                                                 |
| c1071                                         | <i>ompF</i> | Outer membrane protein F                                       | -2.53                                                       | -2.34                                           |                                                 |
| c1800                                         |             | Putative oxidoreductase                                        |                                                             | -2.01                                           |                                                 |
| c1804                                         | <i>ynaI</i> | Putative mechanosensitive channel                              | -3.03                                                       | -2.58                                           |                                                 |
| c1937                                         |             | Putative NAD-dependent dehydratase                             | -2.68                                                       | -2.31                                           |                                                 |
| c2049                                         | <i>ydhO</i> | Putative murein DD-endopeptidase                               | -3.11                                                       | -2.54                                           |                                                 |
| c2055                                         | <i>cfa</i>  | Cyclopropane fatty acyl phospholipid synthase                  | -2.03                                                       | -2.01                                           |                                                 |
| c2554                                         | <i>wzzB</i> | Chain length determinant protein                               | -2.16                                                       |                                                 |                                                 |
| c2555                                         | <i>ugd</i>  | UDP-glucose 6-dehydrogenase                                    | -3.14                                                       | -2.56                                           |                                                 |
| c2567                                         | <i>galF</i> | UTP-glucose-1-phosphate uridylyltransferase                    | -2.36                                                       | -2.35                                           |                                                 |
| c2795                                         | <i>yfbE</i> | UDP-4-amino-4-deoxy-L-arabinose--oxoglutarate aminotransferase | -3.59                                                       | -3.56                                           |                                                 |
| c2796                                         |             | Putative glycosyl transferase                                  | -3.38                                                       | -3.50                                           |                                                 |
| c2799                                         | <i>arnT</i> | 4-amino-4-deoxy-L-arabinose transferase                        | -2.57                                                       | -2.49                                           |                                                 |
| c3655                                         |             | Antigen 43                                                     |                                                             | -2.64                                           | -2.89                                           |
| c4324                                         | <i>yhiU</i> | Putative multidrug efflux system protein MdtE                  | -5.22                                                       | -4.90                                           |                                                 |
| c5388                                         |             | N-acetylneuraminic acid mutarotase                             | -3.67                                                       |                                                 |                                                 |
| c1391                                         | <i>lolC</i> | Outer membrane-specific lipoprotein transporter subunit        | 2.54                                                        | 2.09                                            |                                                 |

| <b>Locus tag</b>                                                        | <b>Gene</b> | <b>Description</b>                            | <b><i>cpxA</i> mutant vs <i>cpxR</i> mutant<sup>a</sup></b> | <b><i>cpxA</i> mutant vs parent<sup>b</sup></b> | <b><i>cpxR</i> mutant vs parent<sup>c</sup></b> |
|-------------------------------------------------------------------------|-------------|-----------------------------------------------|-------------------------------------------------------------|-------------------------------------------------|-------------------------------------------------|
| c1717                                                                   | <i>tonB</i> | Transport protein TonB                        | 3.18                                                        | 2.95                                            |                                                 |
| c2915                                                                   | <i>ddg</i>  | Palmetoleoyl acyl transferase                 | 3.61                                                        | 2.37                                            |                                                 |
| c4370                                                                   | <i>yiaD</i> | Outer membrane lipoprotein                    | 2.24                                                        | 2.17                                            |                                                 |
| c5245                                                                   | <i>yjeP</i> | Putative mechanosensitive channel             | 2.35                                                        | 2.20                                            |                                                 |
| c5479                                                                   | <i>slt</i>  | Lytic murein transglycosylase                 | 3.53                                                        | 2.63                                            |                                                 |
| c4316                                                                   | <i>chuY</i> | Hypothetical protein                          | 5.45                                                        | 5.19                                            |                                                 |
| <b>Defense mechanisms</b>                                               |             |                                               |                                                             |                                                 |                                                 |
| c1392                                                                   | <i>lolD</i> | Lipoprotein transporter ATP-binding subunit   | 2.61                                                        | 2.39                                            |                                                 |
| c4325                                                                   | <i>yhiV</i> | Putative multidrug efflux transporter         | -3.95                                                       | -3.91                                           |                                                 |
| <b>Posttranslational modification, protein turnover, and chaperones</b> |             |                                               |                                                             |                                                 |                                                 |
| c0019                                                                   | <i>dnaK</i> | Molecular chaperone DnaK                      | -2.27                                                       | -2.18                                           |                                                 |
| c0539                                                                   | <i>cyoE</i> | Protoheme IX farnesyltransferase              | -2.38                                                       | -2.34                                           |                                                 |
| c0982                                                                   | <i>grxA</i> | Glutaredoxin 1                                | -2.53                                                       |                                                 |                                                 |
| c1879                                                                   |             | Putative glutathione S transferase            | -2.11                                                       |                                                 |                                                 |
| c3114                                                                   | <i>clpB</i> | Protein disaggregation chaperone              | -2.25                                                       | -2.28                                           |                                                 |
| c4606                                                                   | <i>ibpB</i> | Heat shock chaperone IbpB                     | -3.31                                                       |                                                 |                                                 |
| c4607                                                                   | <i>ibpA</i> | Heat shock protein IbpA                       | -2.50                                                       |                                                 |                                                 |
| c0197                                                                   | <i>htrA</i> | Serine endoprotease                           | 2.60                                                        |                                                 |                                                 |
| c1572                                                                   |             | Capsid assembly protein of prophage           | 2.66                                                        | 2.46                                            |                                                 |
| c2238                                                                   | <i>htpX</i> | Heat shock protein HtpX                       | 5.09                                                        | 4.09                                            |                                                 |
| c3226                                                                   | <i>nrdH</i> | Glutaredoxin-like protein                     | 2.74                                                        | 2.84                                            |                                                 |
| c3287                                                                   | <i>hypB</i> | Hydrogenase nickel incorporation protein HypB | 2.40                                                        |                                                 |                                                 |
| c3288                                                                   | <i>hypC</i> | Hydrogenase assembly chaperone                | 2.24                                                        | 2.78                                            |                                                 |
| c4138                                                                   | <i>ppiA</i> | Peptidyl-prolyl cis-trans isomerase           | 3.71                                                        |                                                 |                                                 |
| c5462                                                                   | <i>yjjW</i> | Putative glycine radical enzyme activase      | 3.06                                                        | 2.46                                            |                                                 |
| <b>Signal transduction mechanisms</b>                                   |             |                                               |                                                             |                                                 |                                                 |
| c0435                                                                   |             | Putative phosphodiesterase, c-di-GMP-specific |                                                             | -2.43                                           |                                                 |
| c0509                                                                   | <i>phoR</i> | Phosphate regulon sensor protein              | -2.62                                                       |                                                 |                                                 |

| <b>Locus tag</b> | <b>Gene</b> | <b>Description</b>                              | <b><i>cpxA</i> mutant vs <i>cpxR</i> mutant<sup>a</sup></b> | <b><i>cpxA</i> mutant vs parent<sup>b</sup></b> | <b><i>cpxR</i> mutant vs parent<sup>c</sup></b> |
|------------------|-------------|-------------------------------------------------|-------------------------------------------------------------|-------------------------------------------------|-------------------------------------------------|
| c0435            |             | Putative phosphodiesterase, c-di-GMP-specific   | -2.69                                                       |                                                 |                                                 |
| c0508            | <i>phoB</i> | Transcriptional regulator PhoB                  | -2.89                                                       | -2.24                                           |                                                 |
| c0940            | <i>ybil</i> | Putative catecholate siderophore receptor       | -2.08                                                       | -3.32                                           |                                                 |
| c1159            | <i>phoH</i> | Putative phosphate-starvation inducible protein | -5.75                                                       | -6.04                                           |                                                 |
| c1821            | <i>ynaF</i> | Putative universal stress protein UspF          | -2.82                                                       | -2.41                                           |                                                 |
| c1918            |             | Putative sensor kinase                          | -2.85                                                       | -3.04                                           |                                                 |
| c3564            |             | Putative response regulator                     | -2.07                                                       |                                                 |                                                 |
| c3565            |             | Putative response regulator                     | -2.48                                                       |                                                 |                                                 |
| c4323            | <i>yhiE</i> | Putative transcriptional regulator GadE         | -6.49                                                       | -5.76                                           |                                                 |
| c4331            | <i>yhjB</i> | Transcriptional regulator YhjB                  | -2.80                                                       | -2.58                                           |                                                 |
| c4875            | <i>yiiT</i> | Universal stress protein UspD                   | -3.27                                                       | -3.29                                           |                                                 |
| c5052            | <i>yjcC</i> | Putative c-di-GMP-specific phosphodiesterase    | -3.41                                                       | -3.20                                           |                                                 |
| c4818            | <i>glnL</i> | Nitrogen regulation protein                     | 2.42                                                        |                                                 |                                                 |

## INFORMATION STORAGE AND PROCESSING

### Replication, recombination, and repair

|       |             |                                 |       |       |  |
|-------|-------------|---------------------------------|-------|-------|--|
| c1011 | <i>ybjD</i> | Hypothetical protein            | -2.11 |       |  |
| c2405 |             | Hypothetical protein            | -2.12 |       |  |
| c2473 |             | Transposase                     | -2.08 |       |  |
| c2474 |             | Transposase                     | -2.45 |       |  |
| c4511 |             | Putative TatD hydrolase         | -2.04 | -2.01 |  |
| c5196 |             | Transposase                     | -2.84 | -2.57 |  |
| c0880 | <i>rhIE</i> | ATP-dependent RNA helicase RhIE | 2.04  |       |  |
| c2254 |             | Exodeoxyribonuclease X          | 2.34  | 2.18  |  |
| c4167 | <i>nudE</i> | ADP-ribose diphosphatase        | 2.11  |       |  |
| c4818 | <i>glnL</i> | Nitrogen regulation protein     |       | 2.29  |  |
| c5254 | <i>mutL</i> | DNA mismatch repair protein     | 2.81  | 2.46  |  |

### Transcription

| <b>Locus tag</b>                                        | <b>Gene</b>   | <b>Description</b>                                   | <b><i>cpxA</i> mutant vs <i>cpxR</i> mutant<sup>a</sup></b> | <b><i>cpxA</i> mutant vs parent<sup>b</sup></b> | <b><i>cpxR</i> mutant vs parent<sup>c</sup></b> |
|---------------------------------------------------------|---------------|------------------------------------------------------|-------------------------------------------------------------|-------------------------------------------------|-------------------------------------------------|
| c0405                                                   | <i>matA</i>   | Putative transcription factor                        | -2.70                                                       | -3.12                                           |                                                 |
| c1169                                                   | <i>alpA</i>   | Prophage CP4-57 regulatory protein AlpA              | -2.34                                                       |                                                 |                                                 |
| c1237                                                   | <i>sfaC</i>   | F1C and S fimbrial switch regulatory protein         | -4.19                                                       | -3.33                                           |                                                 |
| c1247                                                   | <i>focX</i>   | Regulatory protein                                   | -2.93                                                       | -2.31                                           |                                                 |
| c1938                                                   | <i>oprR</i>   | Transcriptional regulator YcjZ                       | -2.21                                                       |                                                 |                                                 |
| c2330                                                   | <i>sdiA</i>   | DNA-binding transcriptional activator SdiA           | -2.14                                                       |                                                 |                                                 |
| c2447                                                   | <i>cbl</i>    | Transcriptional regulator Cbl                        | -3.50                                                       | -3.75                                           |                                                 |
| c3212                                                   | <i>ygaE</i>   | DNA-binding transcriptional regulator CsiR           | -2.04                                                       | -2.30                                           |                                                 |
| c3600                                                   |               | Putative TetR protein                                | -2.70                                                       | -2.29                                           |                                                 |
| c4306                                                   | <i>yhiF</i>   | Transcriptional regulator YhiF                       | -5.01                                                       | -4.71                                           |                                                 |
| c4550                                                   |               | Hypothetical protein                                 | -2.05                                                       |                                                 |                                                 |
| c5142                                                   | <i>cadC</i>   | DNA-binding transcriptional activator CadC           | -3.00                                                       | -2.79                                           |                                                 |
| c5189                                                   | <i>papI_2</i> | P fimbrial regulatory protein                        | -3.24                                                       | -3.05                                           |                                                 |
| c5436                                                   | <i>yjjM</i>   | Putative transcriptional regulator                   | -2.36                                                       |                                                 |                                                 |
| c2830                                                   | <i>lrhA</i>   | Transcriptional regulator LrhA                       | 2.12                                                        | 2.09                                            |                                                 |
| c3237                                                   | <i>emrR</i>   | Transcriptional repressor                            | 2.59                                                        | 2.28                                            |                                                 |
| c3626                                                   | <i>iucB</i>   | Putative aerobactin siderophore biosynthesis protein |                                                             | 2.00                                            |                                                 |
| c3770                                                   |               | Putative transcriptional regulator                   | 2.38                                                        | 2.59                                            |                                                 |
| c3863                                                   | <i>yhaJ</i>   | Transcriptional regulator                            | 2.37                                                        | 2.07                                            |                                                 |
| c3976                                                   | <i>yhcH</i>   | N-acetylmannosamine kinase                           | 2.31                                                        |                                                 |                                                 |
| <b>Translation, ribosomal structure, and biogenesis</b> |               |                                                      |                                                             |                                                 |                                                 |
| c0516                                                   | <i>tgt</i>    | Queuine tRNA-ribosyltransferase                      | 3.10                                                        | 2.54                                            |                                                 |
| c3119                                                   | <i>yfiA</i>   | Translation inhibitor protein RaiA                   | 2.88                                                        |                                                 |                                                 |
| c4076                                                   | <i>rpsQ</i>   | 30S ribosomal protein S17                            | 2.34                                                        | 2.39                                            |                                                 |
| c4079                                                   | <i>rplP</i>   | 50S ribosomal protein L16                            | 2.43                                                        | 2.58                                            |                                                 |
| c4080                                                   |               | 30S ribosomal protein S3                             | 2.73                                                        | 2.87                                            |                                                 |

| <b>Locus tag</b> | <b>Gene</b> | <b>Description</b>             | <b><i>cpxA</i> mutant vs <i>cpxR</i> mutant<sup>a</sup></b> | <b><i>cpxA</i> mutant vs parent<sup>b</sup></b> | <b><i>cpxR</i> mutant vs parent<sup>c</sup></b> |
|------------------|-------------|--------------------------------|-------------------------------------------------------------|-------------------------------------------------|-------------------------------------------------|
| c4083            | <i>rpsS</i> | 30S ribosomal protein S19      | 2.79                                                        | 3.09                                            |                                                 |
| c4085            | <i>rplB</i> | 50S ribosomal protein L2       | 2.81                                                        | 2.98                                            |                                                 |
| c4087            | <i>rplW</i> | 50S ribosomal protein L23      | 2.81                                                        | 3.16                                            |                                                 |
| c4092            | <i>rpsJ</i> | 30S ribosomal protein S10      | 2.75                                                        | 3.07                                            |                                                 |
| c4941            | <i>rplJ</i> | 50S ribosomal protein L10      | 2.09                                                        | 2.26                                            |                                                 |
| c4943            | <i>rplL</i> | 50S ribosomal protein          |                                                             | 2.07                                            |                                                 |
| c5018            | <i>yjbN</i> | Trna-dihydrouridine synthase A | 2.16                                                        |                                                 |                                                 |

## **METABOLISM**

### **Amino acid transport and metabolism**

|       |             |                                                    |       |       |  |
|-------|-------------|----------------------------------------------------|-------|-------|--|
| c0431 | <i>betA</i> | Choline dehydrogenase                              | -2.07 | -2.10 |  |
| c0606 | <i>ybaT</i> | Transport protein YbaT                             | -2.97 | -2.99 |  |
| c0988 | <i>potG</i> | Putrescine transporter ATP-binding subunit         |       | -2.02 |  |
| c1707 | <i>oppA</i> | Periplasmic oligopeptide-binding protein           | -2.06 | -2.23 |  |
| c1708 | <i>oppB</i> | Oligopeptide transporter permease                  |       | -2.04 |  |
| c1803 | <i>mppA</i> | Periplasmic murein peptide-binding                 | -2.43 | -2.31 |  |
| c1921 | <i>xasA</i> | Amino acid antiporter                              | -7.63 | -7.28 |  |
| c1922 | <i>gadB</i> | Glutamate decarboxylase beta                       | -7.17 | -6.89 |  |
| c2335 | <i>fliY</i> | Cystine transporter subunit                        | -2.84 | -2.87 |  |
| c2679 | <i>yeiT</i> | Oxidoreductase                                     | -3.15 | -2.73 |  |
| c3211 | <i>gabP</i> | Gamma-aminobutyrate transporter                    | -2.69 | -2.94 |  |
| c3319 | <i>cysD</i> | Sulfate adenyltransferase subunit 2                | -2.65 | -3.33 |  |
| c3407 |             | Beta-cystathionase                                 | -2.16 |       |  |
| c4328 | <i>gadA</i> | Glutamate decarboxylase alpha                      | -8.09 | -7.78 |  |
| c4501 |             | Putative arginine decarboxylase                    | -2.44 | -2.50 |  |
| c4502 |             | Antiporter                                         | -2.33 |       |  |
| c5081 |             | Putative ABC transporter substrate binding protein | -2.31 | -2.31 |  |
| c0040 | <i>carA</i> | Carbamoyl phosphate synthase small subunit         | 3.26  | 3.14  |  |

| <b>Locus tag</b>                             | <b>Gene</b> | <b>Description</b>                                      | <b><i>cpxA</i> mutant vs <i>cpxR</i> mutant<sup>a</sup></b> | <b><i>cpxA</i> mutant vs parent<sup>b</sup></b> | <b><i>cpxR</i> mutant vs parent<sup>c</sup></b> |
|----------------------------------------------|-------------|---------------------------------------------------------|-------------------------------------------------------------|-------------------------------------------------|-------------------------------------------------|
| c0041                                        | <i>carB</i> | Carbamoyl phosphate synthase large subunit              | 2.95                                                        | 3.23                                            |                                                 |
| c0568                                        | <i>glnK</i> | Nitrogen regulatory protein P-II 2                      | 3.92                                                        | 3.45                                            |                                                 |
| c0737                                        | <i>gltK</i> | Glutamate/aspartate transport system permease GltK      |                                                             | 2.01                                            |                                                 |
| c0738                                        | <i>gltJ</i> | Glutamate/aspartate transport system permease GltJ      |                                                             | 2.37                                            |                                                 |
| c0739                                        | <i>ybeJ</i> | Glutamate and aspartate transporter subunit transporter | 2.39                                                        | 2.08                                            |                                                 |
| c2256                                        | <i>ptrB</i> | Protease II                                             | 2.36                                                        | 2.21                                            |                                                 |
| c2831                                        |             | Aminotransferase                                        | 2.37                                                        | 2.13                                            |                                                 |
| c3122                                        | <i>aroF</i> | Phospho-2-dehydro-3-deoxyheptonate aldolase             | 4.39                                                        | 3.94                                            |                                                 |
| c3235                                        | <i>ygaZ</i> | Putative L-valine exporter                              | 2.77                                                        | 2.02                                            |                                                 |
| c3639                                        |             | N-acetylneuraminate lyase                               | 2.59                                                        | 2.74                                            |                                                 |
| c3974                                        | <i>gltD</i> | Glutamate synthase subunit beta                         | 3.05                                                        | 2.84                                            |                                                 |
| c3979                                        | <i>nanA</i> | N-acetylneuraminate lyase                               | 3.29                                                        | 2.62                                            |                                                 |
| c4269                                        | <i>nikA</i> | Nickel-binding periplasmic protein                      |                                                             | 2.14                                            |                                                 |
| c4270                                        | <i>nikB</i> | Nickel transporter permease NikB                        | 2.35                                                        | 2.13                                            |                                                 |
| c4271                                        | <i>nikC</i> | Nickel transporter permease NikC                        | 2.45                                                        | 2.22                                            |                                                 |
| c4272                                        | <i>nikD</i> | Nickel transporter ATP-binding protein NikD             | 2.38                                                        |                                                 |                                                 |
| c4273                                        | <i>nikE</i> | Nickel transporter ATP-binding protein NikE             | 2.41                                                        |                                                 |                                                 |
| c4690                                        | <i>ilvG</i> | Acetolactate synthase 2 catalytic subunit               | 2.45                                                        | 2.08                                            |                                                 |
| c4692                                        | <i>ilvE</i> | Branched-chain amino acid aminotransferase              | 2.15                                                        |                                                 |                                                 |
| c4694                                        | <i>ilvA</i> | Threonine dehydratase                                   | 2.72                                                        | 2.19                                            |                                                 |
| c5473                                        | <i>serB</i> | Phosphoserine phosphatase                               | 2.18                                                        |                                                 |                                                 |
| <b>Carbohydrate transport and metabolism</b> |             |                                                         |                                                             |                                                 |                                                 |
| c0153                                        | <i>gcd</i>  | Glucose dehydrogenase                                   | -2.40                                                       | -2.28                                           |                                                 |
| c1843                                        |             | Glyceraldehyde 3-phosphate dehydrogenase A              | -2.48                                                       | -2.59                                           |                                                 |



| <b>Locus tag</b>                         | <b>Gene</b> | <b>Description</b>                                                 | <b><i>cpxA</i> mutant vs <i>cpxR</i> mutant<sup>a</sup></b> | <b><i>cpxA</i> mutant vs parent<sup>b</sup></b> | <b><i>cpxR</i> mutant vs parent<sup>c</sup></b> |
|------------------------------------------|-------------|--------------------------------------------------------------------|-------------------------------------------------------------|-------------------------------------------------|-------------------------------------------------|
| c2136                                    | <i>celB</i> | PTS system N,N-diacetylchitobiose-specific transporter subunit IIC | -2.26                                                       |                                                 |                                                 |
| c3070                                    | <i>yphF</i> | ABC transporter periplasmic-binding protein                        | -2.19                                                       |                                                 |                                                 |
| c4241                                    | <i>ugpA</i> | Glycerol-3-phosphate transporter permease                          | -2.21                                                       |                                                 |                                                 |
| c4242                                    | <i>ugpB</i> | Glycerol-3-phosphate transporter periplasmic binding protein       | -2.87                                                       |                                                 |                                                 |
| c4283                                    |             | Phosphocarrier protein                                             | -2.61                                                       | -2.50                                           |                                                 |
| c4330                                    | <i>treF</i> | Trehalase                                                          |                                                             | -2.24                                           |                                                 |
| c0922                                    | <i>yliI</i> | Putative aldose sugar dehydrogenase                                | 4.37                                                        | 2.27                                            | -2.10                                           |
| c1254                                    | <i>iroB</i> | Glucosyltransferase                                                | 3.43                                                        | 3.22                                            |                                                 |
| c3977                                    | <i>yhcJ</i> | N-acetylmannosamine-6-phosphate 2-epimerase                        | 2.22                                                        | 2.26                                            |                                                 |
| c4749                                    | <i>yigM</i> | Membrane protein YigM                                              | 2.61                                                        | 2.25                                            |                                                 |
| <b>Coenzyme transport and metabolism</b> |             |                                                                    |                                                             |                                                 |                                                 |
| c2471                                    |             | Putative 4'-phosphopantetheinyl transferase                        | -2.61                                                       |                                                 |                                                 |
| c3715                                    |             | Putative 8-amino-7-oxononanoate synthase                           | -2.41                                                       | -2.54                                           |                                                 |
| c0680                                    | <i>entC</i> | Isochorismate synthase                                             | 4.96                                                        | 4.15                                            |                                                 |
| c0853                                    | <i>bioA</i> | Adenosylmethionine-8-amino-7-oxononanoate aminotransferase         | 2.41                                                        | 3.12                                            |                                                 |
| c0855                                    | <i>bioB</i> | Biotin synthase                                                    | 2.45                                                        | 2.37                                            |                                                 |
| c0856                                    | <i>bioF</i> | 8-amino-7-oxononanoate synthase                                    | 3.20                                                        | 2.98                                            |                                                 |
| c0858                                    | <i>bioD</i> | Dithiobiotin synthetase                                            | 2.12                                                        |                                                 |                                                 |
| c3541                                    | <i>yggW</i> | Coproporphyrinogen III oxidase                                     | 2.19                                                        |                                                 |                                                 |
| c4314                                    | <i>chuW</i> | Coproporphyrinogen III oxidase                                     | 5.82                                                        | 5.91                                            |                                                 |
| <b>Energy production and conversion</b>  |             |                                                                    |                                                             |                                                 |                                                 |
| c0409                                    |             | Oxidoreductase                                                     | -2.40                                                       | -2.05                                           |                                                 |
| c0420                                    | <i>ykgC</i> | Pyridine nucleotide-disulfide oxidoreductase                       | -3.87                                                       | -3.62                                           |                                                 |
| c0540                                    | <i>cyoD</i> | Cytochrome o ubiquinol oxidase subunit IV                          |                                                             | -2.32                                           |                                                 |

| <b>Locus tag</b> | <b>Gene</b> | <b>Description</b>                              | <b><i>cpxA</i> mutant vs <i>cpxR</i> mutant<sup>a</sup></b> | <b><i>cpxA</i> mutant vs parent<sup>b</sup></b> | <b><i>cpxR</i> mutant vs parent<sup>c</sup></b> |
|------------------|-------------|-------------------------------------------------|-------------------------------------------------------------|-------------------------------------------------|-------------------------------------------------|
| c0541            | <i>cyoC</i> | Cytochrome o ubiquinol oxidase subunit III      | -2.98                                                       | -2.63                                           |                                                 |
| c0543            | <i>cyoA</i> | Cytochrome o ubiquinol oxidase subunit II       | -2.11                                                       | -2.19                                           |                                                 |
| c1078            | <i>ycbN</i> | Alkanesulfonate monooxygenase                   | -2.34                                                       | -2.62                                           |                                                 |
| c1119            | <i>appC</i> | Cytochrome bd-II oxidase subunit I              | -2.45                                                       | -2.61                                           |                                                 |
| c1120            | <i>appB</i> | Cytochrome bd-II oxidase subunit II             | -2.12                                                       | -2.07                                           |                                                 |
| c1897            | <i>narV</i> | Respiratory nitrate reductase 2 subunit gamma   | -2.15                                                       | -2.27                                           |                                                 |
| c1898            | <i>narW</i> | Respiratory nitrate reductase 2 subunit delta   | -2.87                                                       | -3.12                                           |                                                 |
| c1899            | <i>narY</i> | Respiratory nitrate reductase 2 subunit beta    | -2.89                                                       | -3.00                                           |                                                 |
| c1900            | <i>narZ</i> | Respiratory nitrate reductase 2 subunit alpha   | -3.80                                                       | -3.85                                           |                                                 |
| c2003            | <i>fumC</i> | Fumarate hydratase                              |                                                             | -2.11                                           |                                                 |
| c2820            | <i>nuoK</i> | NADH dehydrogenase subunit K                    | -2.31                                                       | -2.32                                           |                                                 |
| c2821            | <i>nuoJ</i> | NADH dehydrogenase subunit J                    | -2.11                                                       |                                                 |                                                 |
| c2822            | <i>nuoI</i> | NADH dehydrogenase subunit I                    | -2.16                                                       |                                                 |                                                 |
| c3566            |             | Putative thiosulfate reductase cytochrome B     | -3.06                                                       | -2.76                                           |                                                 |
| c3704            | <i>yghK</i> | Glycolate transporter                           | -2.92                                                       | -2.71                                           |                                                 |
| c3709            | <i>glcD</i> | Glycolate oxidase subunit GlcD                  | -3.86                                                       | -3.90                                           |                                                 |
| c3991            | <i>mdh</i>  | Malate dehydrogenase                            | -2.29                                                       | -2.61                                           |                                                 |
| c4971            | <i>aceB</i> | Malate synthase                                 | -2.37                                                       | -2.28                                           |                                                 |
| c4972            | <i>aceA</i> | Isocitrate lyase                                | -2.80                                                       | -2.69                                           |                                                 |
| c0142            | <i>aceE</i> | Pyruvate dehydrogenase subunit E1               | 3.24                                                        | 3.12                                            |                                                 |
| c1323            |             | Cytochrome b561 2                               | 2.96                                                        | 2.32                                            |                                                 |
| c2782            | <i>glpA</i> | Sn-glycerol-3-phosphate dehydrogenase subunit A | 3.00                                                        | 2.86                                            |                                                 |
| c4141            | <i>nirB</i> | Nitrite reductase [NAD(P)H] large subunit       | 2.41                                                        | 2.08                                            |                                                 |
| c5241            | <i>frdB</i> | Fumarate reductase iron-sulfur subunit          | 2.13                                                        |                                                 |                                                 |
| c5242            | <i>frdA</i> | Fumarate reductase flavoprotein subunit         | 2.11                                                        |                                                 |                                                 |

| <b>Locus tag</b>                              | <b>Gene</b> | <b>Description</b>                                    | <b><i>cpxA</i> mutant vs <i>cpxR</i> mutant<sup>a</sup></b> | <b><i>cpxA</i> mutant vs parent<sup>b</sup></b> | <b><i>cpxR</i> mutant vs parent<sup>c</sup></b> |
|-----------------------------------------------|-------------|-------------------------------------------------------|-------------------------------------------------------------|-------------------------------------------------|-------------------------------------------------|
| <b>Inorganic ion transport and metabolism</b> |             |                                                       |                                                             |                                                 |                                                 |
| c0472                                         | <i>tauA</i> | Taurine transporter substrate binding subunit         |                                                             | -3.78                                           | -2.07                                           |
| c0473                                         | <i>tauB</i> | Taurine transporter ATP-binding subunit               |                                                             | -2.06                                           |                                                 |
| c0475                                         | <i>tauC</i> | Taurine transporter subunit                           |                                                             | -2.78                                           |                                                 |
| c0490                                         | <i>phoA</i> | Alkaline phosphatase                                  | -3.13                                                       | -3.13                                           |                                                 |
| c0659                                         | <i>cusX</i> | Periplasmic copper-binding protein                    | -5.80                                                       |                                                 |                                                 |
| c0490                                         | <i>phoA</i> | Alkaline phosphatase                                  | -3.84                                                       |                                                 |                                                 |
| c1079                                         | <i>ycbO</i> | Alkanesulfonate transporter substrate-binding subunit |                                                             | -2.07                                           |                                                 |
| c1155                                         |             | Cytochrome                                            | -2.52                                                       |                                                 |                                                 |
| c1156                                         | <i>ycdO</i> | Putative periplasmic lipoprotein                      | -3.72                                                       | -2.26                                           |                                                 |
| c1157                                         | <i>ycdB</i> | Putative iron-dependent peroxidase                    | -2.39                                                       |                                                 |                                                 |
| c1715                                         | <i>kch</i>  | Voltage-gated potassium channel                       | -2.83                                                       | -2.55                                           |                                                 |
| c1901                                         | <i>narU</i> | Nitrite extrusion protein 2                           | -5.59                                                       | -5.25                                           |                                                 |
| c2321                                         | <i>ftn</i>  | Ferritin                                              | -4.37                                                       | -3.89                                           |                                                 |
| c2352                                         | <i>emrE</i> | Multidrug efflux protein                              | -2.23                                                       |                                                 |                                                 |
| c2998                                         | <i>yffB</i> | Putative arsenate reductase                           | -2.17                                                       | -2.13                                           |                                                 |
| c3317                                         | <i>cysC</i> | Adenylylsulfate kinase                                | -2.83                                                       | -3.12                                           |                                                 |
| c3318                                         | <i>cysN</i> | Sulfate adenylyltransferase subunit 1                 | -2.46                                                       | -3.01                                           |                                                 |
| c4107                                         | <i>bfr</i>  | Bacterioferritin                                      | -2.89                                                       | -2.71                                           |                                                 |
| c4262                                         | <i>zntA</i> | Zinc/cadmium/mercury/lead-transporting ATPase         | -3.11                                                       | -3.22                                           |                                                 |
| c4319                                         | <i>yhiD</i> | Mg transport ATPase                                   | -6.75                                                       |                                                 |                                                 |
| c4329                                         | <i>yhjA</i> | Cytochrome C peroxidase                               | -2.04                                                       |                                                 |                                                 |
| c4583                                         | <i>nlpA</i> | Cytoplasmic membrane lipoprotein-28                   | -4.39                                                       | -4.50                                           |                                                 |
| c4648                                         | <i>phoU</i> | Transcriptional regulator PhoU                        | -3.74                                                       | -3.25                                           |                                                 |
| c4649                                         | <i>pstB</i> | Phosphate transporter ATP-binding protein             | -3.02                                                       | -2.54                                           |                                                 |
| c4651                                         | <i>pstA</i> | Phosphate transporter permease subunit PstA           | -2.84                                                       | -2.23                                           |                                                 |
| c4652                                         | <i>pstC</i> | Phosphate transporter permease subunit PstC           | -3.35                                                       | -2.48                                           |                                                 |

| <b>Locus tag</b> | <b>Gene</b> | <b>Description</b>                                                   | <b><i>cpxA</i> mutant vs <i>cpxR</i> mutant<sup>a</sup></b> | <b><i>cpxA</i> mutant vs parent<sup>b</sup></b> | <b><i>cpxR</i> mutant vs parent<sup>c</sup></b> |
|------------------|-------------|----------------------------------------------------------------------|-------------------------------------------------------------|-------------------------------------------------|-------------------------------------------------|
| c4653            | <i>pstS</i> | Phosphate ABC transporter periplasmic substrate-binding protein PstS | -4.52                                                       | -3.64                                           |                                                 |
| c4869            | <i>sbp</i>  | Sulfate transporter subunit                                          | -3.07                                                       | -3.57                                           |                                                 |
| c5110            | <i>phnD</i> | Phosphonates-binding periplasmic protein                             | -2.53                                                       |                                                 |                                                 |
| c5341            | <i>mgtA</i> | Magnesium-transporting ATPase MgtA                                   | -2.32                                                       | -2.15                                           |                                                 |
| c0185            | <i>fhuA</i> | Ferrichrome outer membrane transporter                               | 3.74                                                        | 4.15                                            |                                                 |
| c0186            | <i>fhuC</i> | Iron-hydroxamate transporter ATP-binding subunit                     | 3.64                                                        | 4.24                                            |                                                 |
| c0187            | <i>fhuD</i> | Iron-hydroxamate transporter substrate-binding subunit               | 4.09                                                        | 4.06                                            |                                                 |
| c0188            | <i>fhuB</i> | Iron-hydroxamate transporter permease subunit                        | 3.41                                                        | 3.43                                            |                                                 |
| c0669            | <i>fepA</i> | Outer membrane receptor FepA                                         | 3.27                                                        | 2.98                                            |                                                 |
| c0671            | <i>fes</i>  | Enterobactin esterase                                                | 4.68                                                        | 4.76                                            |                                                 |
| c0675            | <i>fepC</i> | Iron-enterobactin transporter ATP-binding protein                    | 4.05                                                        | 3.98                                            |                                                 |
| c0676            | <i>fepG</i> | Iron-enterobactin transporter permease                               | 4.90                                                        | 4.28                                            |                                                 |
| c0677            | <i>fepD</i> | Iron-enterobactin transporter membrane protein                       | 3.26                                                        | 4.63                                            |                                                 |
| c0679            | <i>fepB</i> | Iron-enterobactin transporter periplasmic binding protein            | 3.60                                                        | 3.74                                            |                                                 |
| c1597            | <i>sitD</i> | SitD protein                                                         | 2.34                                                        | 2.51                                            |                                                 |
| c1598            | <i>sitC</i> | SitC protein                                                         | 3.60                                                        | 3.85                                            |                                                 |
| c1599            | <i>sitB</i> | SitB protein                                                         | 3.91                                                        | 4.14                                            |                                                 |
| c1600            | <i>sitA</i> | SitA protein                                                         | 4.35                                                        | 4.78                                            |                                                 |
| c1676            | <i>chaA</i> | Calcium/sodium:proton antiporter                                     | 4.45                                                        | 3.44                                            |                                                 |
| c1684            | <i>narK</i> | Nitrite extrusion protein 1                                          | 2.34                                                        | 2.50                                            |                                                 |
| c1991            | <i>ydgE</i> | Multidrug efflux system protein MdtI                                 | 2.80                                                        | 2.24                                            |                                                 |
| c1992            | <i>ydgF</i> | Multidrug efflux system protein MdtJ                                 | 2.55                                                        |                                                 |                                                 |
| c2101            | <i>ydiE</i> | Hypothetical protein                                                 | 2.84                                                        | 3.46                                            |                                                 |
| c2315            | <i>yecI</i> | Ferritin                                                             | 3.44                                                        | 2.57                                            |                                                 |

| <b>Locus tag</b>                      | <b>Gene</b> | <b>Description</b>                                             | <b><i>cpxA</i> mutant vs <i>cpxR</i> mutant<sup>a</sup></b> | <b><i>cpxA</i> mutant vs parent<sup>b</sup></b> | <b><i>cpxR</i> mutant vs parent<sup>c</sup></b> |
|---------------------------------------|-------------|----------------------------------------------------------------|-------------------------------------------------------------|-------------------------------------------------|-------------------------------------------------|
| c3217                                 | <i>ygaP</i> | Hypothetical protein, membrane protein                         | 2.00                                                        |                                                 |                                                 |
| c3771                                 |             | Iron ABC transporter substrate-binding protein                 | 2.67                                                        | 2.87                                            |                                                 |
| c3772                                 |             | Iron ABC transporter permease                                  | 2.29                                                        | 2.98                                            |                                                 |
| c3773                                 |             | Iron ABC transporter permease                                  | 2.51                                                        | 3.23                                            |                                                 |
| c3774                                 |             | Ferric enterobactin transport ATP-binding protein              | 3.31                                                        | 3.48                                            |                                                 |
| c3823                                 | <i>yqjH</i> | Putative ferric reductase                                      | 3.68                                                        | 3.25                                            |                                                 |
| c4108                                 | <i>yheA</i> | Bacterioferritin-associated ferredoxin                         | 2.10                                                        | 2.27                                            |                                                 |
| c4142                                 | <i>nirD</i> | Nitrite reductase small subunit                                | 2.75                                                        |                                                 |                                                 |
| c4143                                 | <i>nirC</i> | Nitrite transporter NirC                                       | 2.81                                                        |                                                 |                                                 |
| c4186                                 | <i>feoB</i> | Ferrous iron transport protein B                               | 2.67                                                        | 2.38                                            |                                                 |
| c4308                                 | <i>chuA</i> | Outer membrane heme/hemoglobin receptor                        | 3.16                                                        | 3.01                                            |                                                 |
| c4313                                 | <i>chuT</i> | Periplasmic binding protein                                    | 5.75                                                        | 6.33                                            |                                                 |
| c4317                                 | <i>chuU</i> | Iron ABC transporter permease                                  | 4.62                                                        | 4.91                                            |                                                 |
| c4318                                 | <i>hmuV</i> | Hemin importer ATP-binding subunit                             | 3.03                                                        | 3.08                                            |                                                 |
| <b>Lipid transport and metabolism</b> |             |                                                                |                                                             |                                                 |                                                 |
| c0926                                 | <i>ybjG</i> | Undecaprenyl pyrophosphate phosphatase                         | -3.40                                                       | -3.04                                           |                                                 |
| c1200                                 |             | Acyl carrier protein                                           | -2.18                                                       | -2.25                                           |                                                 |
| c2011                                 | <i>hdhA</i> | 7-alpha-hydroxysteroid dehydrogenase                           | -2.94                                                       | -2.67                                           |                                                 |
| c2467                                 |             | 3-hydroxyacyl-coa dehydrogenase                                | -2.28                                                       |                                                 |                                                 |
| c3467                                 |             | Isopentenyl-diphosphate delta-isomerase                        | -2.81                                                       | -2.63                                           |                                                 |
| c3714                                 |             | Putative acyl carrier protein                                  | -3.46                                                       | -3.28                                           |                                                 |
| c5275                                 | <i>aidB</i> | Isovaleryl CoA dehydrogenase                                   | -3.12                                                       | -3.13                                           |                                                 |
| c0683                                 | <i>entA</i> | 2,3-dihydroxybenzoate-2,3-dehydrogenase                        | 4.38                                                        | 4.51                                            |                                                 |
| c4011                                 | <i>accB</i> | Acetyl-CoA carboxylase biotin carboxyl carrier protein subunit | 2.35                                                        |                                                 |                                                 |
| c4012                                 | <i>accC</i> | Acetyl-CoA carboxylase biotin carboxylase subunit              | 2.38                                                        | 2.03                                            |                                                 |

| <b>Locus tag</b>                                                     | <b>Gene</b> | <b>Description</b>                                              | <b><i>cpxA</i> mutant vs <i>cpxR</i> mutant<sup>a</sup></b> | <b><i>cpxA</i> mutant vs parent<sup>b</sup></b> | <b><i>cpxR</i> mutant vs parent<sup>c</sup></b> |
|----------------------------------------------------------------------|-------------|-----------------------------------------------------------------|-------------------------------------------------------------|-------------------------------------------------|-------------------------------------------------|
| c5247                                                                | <i>psd</i>  | Phosphatidylserine decarboxylase                                | 2.92                                                        | 2.43                                            |                                                 |
| <b>Nucleotide transport and metabolism</b>                           |             |                                                                 |                                                             |                                                 |                                                 |
| c3460                                                                | <i>ygfO</i> | Purine permease YgfO                                            | -2.07                                                       |                                                 |                                                 |
| c0636                                                                | <i>purK</i> | Phosphoribosylaminoimidazole carboxylase ATPase subunit         | 2.42                                                        | 2.54                                            |                                                 |
| c0637                                                                | <i>purE</i> | Phosphoribosylaminoimidazole carboxylase catalytic subunit      |                                                             | 2.15                                            |                                                 |
| c3017                                                                | <i>purM</i> | Phosphoribosylaminoimidazole synthetase                         | 2.76                                                        | 2.79                                            |                                                 |
| c3227                                                                | <i>nrdI</i> | Ribonucleotide reductase stimulatory protein                    | 3.12                                                        | 2.96                                            |                                                 |
| c3228                                                                | <i>nrdE</i> | Ribonucleotide-diphosphate reductase subunit                    | 2.76                                                        | 2.96                                            |                                                 |
| c3229                                                                | <i>nrdF</i> | Ribonucleotide-diphosphate reductase subunit beta               | 2.02                                                        | 2.18                                            |                                                 |
| c3540                                                                | <i>yggV</i> | Deoxyribonucleotide triphosphate pyrophosphatase                | 2.22                                                        | 2.01                                            |                                                 |
| c4479                                                                | <i>yicE</i> | Putative purine permease YicE                                   |                                                             | 2.21                                            |                                                 |
| c4963                                                                | <i>purD</i> | Phosphoribosylamine-glycine ligase                              | 3.06                                                        | 3.66                                            |                                                 |
| <b>Secondary metabolites biosynthesis, transport, and catabolism</b> |             |                                                                 |                                                             |                                                 |                                                 |
| c1034                                                                | <i>ycaC</i> | Putative amidases                                               | -2.53                                                       | -2.31                                           |                                                 |
| c2451                                                                |             | Thioesterase                                                    | -2.24                                                       | -2.05                                           |                                                 |
| c0616                                                                | <i>ybbA</i> | ABC transporter ATP-binding protein YbbA                        | 4.02                                                        | 3.42                                            |                                                 |
| c0617                                                                | <i>ybbP</i> | Putative transport protein                                      | 3.96                                                        | 3.28                                            |                                                 |
| c0681                                                                | <i>entE</i> | Enterobactin synthase subunit E                                 | 4.10                                                        | 4.61                                            |                                                 |
| c0684                                                                | <i>ybdB</i> | Putative proofreading thioesterase in enterobactin biosynthesis | 3.75                                                        | 3.56                                            |                                                 |
| c2752                                                                | <i>yojI</i> | Multidrug transporter membrane - ATP-binding component          |                                                             | 2.04                                            |                                                 |

<sup>a</sup> Genes differentially expressed in CFT073Δ*cpxA*::*cat* vs CFT073Δ*cpxR*::*cat*.

<sup>b</sup> Genes differentially expressed in CFT073Δ*cpxA*::*cat* vs CFT073.

<sup>c</sup> Genes differentially expressed in CFT073Δ*cpxR*::*cat* vs CFT073.

Values indicate fold change in expression of gene transcription; (-) minus sign indicates downregulation.

**Table S2** Genes with no defined functional category differentially regulated between the parent, the *cpxA* mutant, and the *cpxR* mutant

| Locus tag                               | Gene        | Description                                | <i>cpxA</i> mutant vs <i>cpxR</i> mutant <sup>a</sup> | <i>cpxA</i> mutant vs parent <sup>b</sup> | <i>cpxR</i> mutant vs parent <sup>c</sup> |
|-----------------------------------------|-------------|--------------------------------------------|-------------------------------------------------------|-------------------------------------------|-------------------------------------------|
| <b>POORLY CHARACTERIZED</b>             |             |                                            |                                                       |                                           |                                           |
| <b>Function unknown</b>                 |             |                                            |                                                       |                                           |                                           |
| c0659                                   | <i>cusX</i> | Periplasmic copper-binding protein         |                                                       | -4.76                                     |                                           |
| c2200                                   | <i>yeaQ</i> | Hypothetical protein, membrane protein     | -2.85                                                 | -2.46                                     |                                           |
| c2450                                   |             | Hypothetical protein                       | -3.13                                                 | -2.77                                     |                                           |
| c3065                                   | <i>yphA</i> | Hypothetical protein, membrane protein     |                                                       | -2.21                                     |                                           |
| c4319                                   | <i>yhiD</i> | Mg transport ATPase                        |                                                       | -6.36                                     |                                           |
| c4322                                   | <i>hdeD</i> | Acid-resistance membrane protein           | -7.19                                                 | -6.84                                     |                                           |
| c5016                                   | <i>yjbJ</i> | Stress-response protein                    | -2.13                                                 |                                           |                                           |
| c5388                                   |             | N-acetylneuraminic acid mutarotase         |                                                       | -3.26                                     |                                           |
| c0587                                   | <i>ybaN</i> | Hypothetical protein                       | 2.81                                                  | 2.53                                      |                                           |
| c1387                                   | <i>ycfS</i> | Putative L,D-transpeptidase                | 4.61                                                  | 4.33                                      |                                           |
| c1877                                   | <i>yncE</i> | Hypothetical protein                       | 3.05                                                  | 3.66                                      |                                           |
| c2141                                   | <i>ydjR</i> | Hypothetical protein                       |                                                       | 3.40                                      |                                           |
| c3539                                   | <i>yggU</i> | Hypothetical protein                       | 2.03                                                  |                                           |                                           |
| c3783                                   | <i>ygiB</i> | Hypothetical protein, membrane protein     | 3.03                                                  |                                           |                                           |
| c3853                                   | <i>yqjA</i> | Hypothetical protein                       | 3.52                                                  | 3.28                                      |                                           |
| c4691                                   | <i>ilvM</i> | Acetolactate synthase 2 regulatory subunit | 2.12                                                  |                                           |                                           |
| c5409                                   | <i>yjiG</i> | Hypothetical protein                       | 2.08                                                  |                                           |                                           |
| <b>General function prediction only</b> |             |                                            |                                                       |                                           |                                           |
| c0284                                   |             | Putative phospholipase                     |                                                       | -3.14                                     | -2.51                                     |
| c0410                                   |             | Putative alpha/beta hydrolase              | -3.18                                                 | -2.96                                     |                                           |
| c0417                                   |             | 2,5-diketo-D-gluconate reductase A         | -2.90                                                 | -2.70                                     |                                           |
| c0457                                   | <i>lacA</i> | Galactoside O-acetyltransferase            | -2.41                                                 | -2.02                                     |                                           |
| c0611                                   | <i>ybbL</i> | ABC transporter ATP-binding protein YbbL   | -2.19                                                 | -2.23                                     |                                           |
| c0629                                   | <i>ylbA</i> | Putative S-ureidoglycine aminohydrolase    | -2.15                                                 | -2.18                                     |                                           |
| c1269                                   |             | Hypothetical protein                       | -2.04                                                 |                                           |                                           |
| c2350                                   | <i>ybcL</i> | Kinase inhibitor                           | -2.76                                                 | -2.09                                     |                                           |

| <b>Locus tag</b>    | <b>Gene</b> | <b>Description</b>                             | <b><i>cpxA</i> mutant vs <i>cpxR</i> mutant<sup>a</sup></b> | <b><i>cpxA</i> mutant vs parent<sup>b</sup></b> | <b><i>cpxR</i> mutant vs parent<sup>c</sup></b> |
|---------------------|-------------|------------------------------------------------|-------------------------------------------------------------|-------------------------------------------------|-------------------------------------------------|
| c2385               | <i>yedU</i> | Chaperone protein HchA                         | -2.30                                                       | -2.16                                           |                                                 |
| c2389               | <i>yedY</i> | Sulfite oxidase subunit YedY                   |                                                             | -2.16                                           |                                                 |
| c2411               |             | DNA-binding protein H-NS                       | -2.81                                                       | -2.39                                           |                                                 |
| c2495               |             | Phosphotriesterase-related protein             | -2.50                                                       |                                                 |                                                 |
| c3455               | <i>ygfJ</i> | Hypothetical protein                           | -3.50                                                       | -2.71                                           |                                                 |
| c3567               |             | Putative oxidoreductase                        | -2.68                                                       | -2.51                                           |                                                 |
| c3706               | <i>glcG</i> | Hypothetical protein                           | -2.01                                                       |                                                 |                                                 |
| c4512               |             | Hypothetical protein                           | -2.15                                                       | -2.05                                           |                                                 |
| c5223               | <i>fxsA</i> | FxsA, inhibits F exclusion of bacteriophage T7 | -2.48                                                       |                                                 |                                                 |
| c5457               | <i>osmY</i> | Osmotically inducible protein Y precursor      | -3.79                                                       | -3.81                                           |                                                 |
| c1110               | <i>yccA</i> | Putative Bax inhibitor                         | 5.25                                                        |                                                 | -3.95                                           |
| c1569               | <i>nohA</i> | DNA packaging protein of prophage              | 2.08                                                        |                                                 |                                                 |
| c1571               |             | Putative capsid protein of prophage            | 2.05                                                        |                                                 |                                                 |
| c1925               | <i>yddA</i> | ABC transporter ATP-binding protein            |                                                             | 2.05                                            |                                                 |
| c1993               | <i>ydgG</i> | Putative quorum signal AI-2 exporter           | 3.09                                                        |                                                 | -2.15                                           |
| c2253               | <i>yobB</i> | Hypothetical protein                           | 4.43                                                        | 4.24                                            |                                                 |
| c4803               | <i>yihE</i> | Serine/threonine protein kinase                | 3.53                                                        | 3.07                                            |                                                 |
| c5446               | <i>fhuF</i> | Ferric iron reductase                          | 4.11                                                        | 3.70                                            |                                                 |
| <b>UNCLASSIFIED</b> |             |                                                |                                                             |                                                 |                                                 |
| c0043               | <i>caiF</i> | DNA-binding transcriptional activator          | -2.57                                                       | -2.47                                           |                                                 |
| c0200               | <i>yaeH</i> | Hypothetical protein                           | -2.38                                                       | -2.28                                           |                                                 |
| c0279               |             | Hypothetical protein                           | -2.43                                                       | -2.88                                           |                                                 |
| c0280               |             | Hypothetical protein                           | -2.56                                                       | -3.52                                           |                                                 |
| c0281               |             | Hypothetical protein                           | -2.71                                                       | -3.79                                           |                                                 |
| c0282               |             | Hypothetical protein                           | -2.08                                                       | -4.61                                           | -2.53                                           |
| c0283               |             | Hypothetical protein                           | -2.33                                                       | -4.54                                           | -2.21                                           |
| c0286               |             | Hypothetical protein                           |                                                             | -3.80                                           | -3.36                                           |
| c0370               | <i>yfkE</i> | C-lysozyme inhibitor                           | -6.03                                                       | -5.68                                           |                                                 |
| c0166               | <i>yadC</i> | Fimbrial-like adhesin protein                  | -2.15                                                       |                                                 |                                                 |



| <b>Locus tag</b> | <b>Gene</b> | <b>Description</b>                                        | <b><i>cpxA</i> mutant vs <i>cpxR</i> mutant<sup>a</sup></b> | <b><i>cpxA</i> mutant vs parent<sup>b</sup></b> | <b><i>cpxR</i> mutant vs parent<sup>c</sup></b> |
|------------------|-------------|-----------------------------------------------------------|-------------------------------------------------------------|-------------------------------------------------|-------------------------------------------------|
| c0402            | <i>yagX</i> | Putative usher protein                                    |                                                             | -2.20                                           |                                                 |
| c0399            | <i>yagU</i> | Hypothetical protein                                      | -6.27                                                       | -3.54                                           | 2.73                                            |
| c0403            | <i>yagY</i> | Putative fimbrial chaperone                               | -2.21                                                       | -2.84                                           |                                                 |
| c0404            | <i>matB</i> | Putative common pilus-major subunit                       | -2.40                                                       | -2.86                                           |                                                 |
| c0449            | <i>yahO</i> | Hypothetical protein                                      | -4.71                                                       | -4.55                                           |                                                 |
| c0489            | <i>yaiB</i> | Putative anti-adaptor protein                             | -3.90                                                       | -3.45                                           |                                                 |
| c0491            | <i>psiF</i> | Phosphate starvation-inducible protein                    | -2.20                                                       |                                                 |                                                 |
| c0501            | <i>ykiA</i> | Hypothetical protein                                      | -2.51                                                       | -2.42                                           |                                                 |
| c0605            | <i>ybaS</i> | Glutaminase                                               | -3.19                                                       | -2.90                                           |                                                 |
| c0651            |             | Hypothetical protein                                      | -2.30                                                       |                                                 |                                                 |
| c0697            |             | Hypothetical protein                                      | -2.03                                                       |                                                 |                                                 |
| c0713            | <i>pagP</i> | Palmitoyl transferase                                     | -3.53                                                       | -3.46                                           |                                                 |
| c0807            |             | Hypothetical protein                                      | -2.45                                                       |                                                 |                                                 |
| c0829            | <i>ybgS</i> | Hypothetical protein                                      | -2.20                                                       | -2.05                                           |                                                 |
| c0935            | <i>coxT</i> | Regulator for prophage                                    | -2.95                                                       | -3.55                                           |                                                 |
| c0936            |             | Putative phage regulatory protein                         | -2.95                                                       | -3.69                                           |                                                 |
| c0937            |             | Hypothetical protein                                      | -2.93                                                       | -3.65                                           |                                                 |
| c0938            |             | Hypothetical protein                                      | -3.29                                                       | -3.99                                           |                                                 |
| c0939            |             | Hypothetical protein                                      | -2.78                                                       | -3.27                                           |                                                 |
| c0943            |             | Putative DNA damage inducible protein-like family protein | -3.22                                                       | -3.72                                           |                                                 |
| c0944            |             | Hypothetical protein                                      | -2.27                                                       | -2.30                                           |                                                 |
| c0945            |             | Hypothetical protein                                      | -2.20                                                       | -2.38                                           |                                                 |
| c0946            |             | Hypothetical protein                                      |                                                             | -2.05                                           |                                                 |
| c0979            | <i>ogrK</i> | Prophage P2 Ogr protein                                   | -2.28                                                       | -2.98                                           |                                                 |
| c1009            | <i>aqpZ</i> | Aquaporin Z                                               | -3.51                                                       | -3.33                                           |                                                 |
| c1082            | <i>ycbW</i> | Hypothetical protein                                      | -3.16                                                       | -2.87                                           |                                                 |
| c1124            | <i>sfa</i>  | Cold shock gene                                           | -2.66                                                       | -2.28                                           |                                                 |
| c1160            | <i>pgaD</i> | PGA biosynthesis protein                                  | -2.25                                                       |                                                 |                                                 |
| c1125            |             | GnsB protein                                              |                                                             | -2.11                                           |                                                 |
| c1202            |             | Hypothetical protein                                      | -2.25                                                       | -2.47                                           |                                                 |

| <b>Locus tag</b> | <b>Gene</b> | <b>Description</b>                                          | <b><i>cpxA</i> mutant vs <i>cpxR</i> mutant<sup>a</sup></b> | <b><i>cpxA</i> mutant vs parent<sup>b</sup></b> | <b><i>cpxR</i> mutant vs parent<sup>c</sup></b> |
|------------------|-------------|-------------------------------------------------------------|-------------------------------------------------------------|-------------------------------------------------|-------------------------------------------------|
| c1203            |             | O-methyltransferase                                         | -2.31                                                       | -2.48                                           |                                                 |
| c1204            |             | Hypothetical protein                                        | -2.80                                                       | -2.76                                           |                                                 |
| c1246            |             | Putative diguanylate phosphodiesterase                      | -4.07                                                       | -3.57                                           |                                                 |
| c1270            |             | Hypothetical protein                                        | -2.08                                                       |                                                 |                                                 |
| c1308            | <i>ymdA</i> | Hypothetical protein                                        | -2.51                                                       | -2.12                                           |                                                 |
| c1327            | <i>bssS</i> | Biofilm formation regulatory protein BssS                   | -3.78                                                       | -3.47                                           |                                                 |
| c1386            | <i>ycfR</i> | Hypothetical protein                                        | -2.01                                                       |                                                 |                                                 |
| c1418            |             | Hypothetical protein                                        | -2.91                                                       | -2.23                                           |                                                 |
| c1429            | <i>ycgW</i> | Enhancing lycopene biosynthesis protein 1                   | -2.86                                                       | -2.41                                           |                                                 |
| c1474            |             | Putative SAM-dependent methyltransferase                    | -2.21                                                       |                                                 |                                                 |
| c1564            | <i>ybcU</i> | Lambdoid prophage DLP12 Bor-like protein                    | -2.65                                                       | -2.04                                           |                                                 |
| c1609            | <i>ymgB</i> | Putative regulator of acid resistance and biofilm formation | -2.39                                                       | -2.11                                           |                                                 |
| c1625            | <i>ycgJ</i> | Hypothetical protein                                        | -3.03                                                       | -2.79                                           |                                                 |
| c1663            | <i>yehH</i> | Putative stress induced protein                             | -2.31                                                       | -2.11                                           |                                                 |
| c1856            | <i>ydcL</i> | Lipoprotein YdcL                                            | -3.48                                                       | -3.08                                           |                                                 |
| c1885            |             | Hypothetical protein                                        | -2.21                                                       |                                                 |                                                 |
| c1886            |             | Hypothetical protein                                        | -3.24                                                       | -2.69                                           |                                                 |
| c1913            | <i>rpsV</i> | 30S ribosomal subunit S22                                   | -2.17                                                       |                                                 |                                                 |
| c1914            |             | Biofilm-dependent modulation protein                        | -2.06                                                       | -2.12                                           |                                                 |
| c1919            |             | Hypothetical protein                                        | -3.39                                                       | -3.18                                           |                                                 |
| c1939            | <i>oprR</i> | Putative transcriptional regulator                          | -2.37                                                       |                                                 |                                                 |
| c2017            | <i>ydgT</i> | OriC-binding nucleoid-associated protein                    | -4.03                                                       | -3.10                                           |                                                 |
| c2018            | <i>ydgK</i> | Hypothetical protein                                        | -2.34                                                       |                                                 |                                                 |
| c2091            | <i>ydiP</i> | Transcriptional regulator                                   | -2.80                                                       | -2.52                                           |                                                 |
| c2092            |             | Hypothetical protein                                        | -3.04                                                       | -2.62                                           |                                                 |
| c2099            | <i>ydiA</i> | Putative phosphoenolpyruvate synthase regulatory protein    | -2.57                                                       | -2.46                                           |                                                 |
| c2103            | <i>ydiV</i> | Putative anti-flhdc factor                                  | -2.44                                                       | -2.24                                           |                                                 |

| <b>Locus tag</b> | <b>Gene</b> | <b>Description</b>                                                                                | <b><i>cpxA</i> mutant vs <i>cpxR</i> mutant<sup>a</sup></b> | <b><i>cpxA</i> mutant vs parent<sup>b</sup></b> | <b><i>cpxR</i> mutant vs parent<sup>c</sup></b> |
|------------------|-------------|---------------------------------------------------------------------------------------------------|-------------------------------------------------------------|-------------------------------------------------|-------------------------------------------------|
| c2201            |             | Hypothetical protein                                                                              | -2.64                                                       |                                                 |                                                 |
| c2214            | <i>yoaC</i> | Hypothetical protein                                                                              | -3.76                                                       | -3.33                                           |                                                 |
| c2215            |             | Hypothetical protein                                                                              | -2.48                                                       | -2.05                                           |                                                 |
| c2233            | <i>yebO</i> | Hypothetical protein                                                                              | -2.40                                                       | -2.06                                           |                                                 |
| c2234            | <i>yobG</i> | Putative Pho family transcriptional regulator                                                     | -2.67                                                       | -2.32                                           |                                                 |
| c2235            |             | Hypothetical protein                                                                              | -2.54                                                       | -2.50                                           |                                                 |
| c2320            |             | Hypothetical protein                                                                              | -2.60                                                       | -2.24                                           |                                                 |
| c2329            | <i>yecF</i> | Hypothetical protein                                                                              | -2.01                                                       |                                                 |                                                 |
| c2336            | <i>fliZ</i> | Flagella biosynthesis protein FliZ                                                                | -2.11                                                       |                                                 |                                                 |
| c2349            | <i>ybcM</i> | Transcriptional regulator YbcM                                                                    | -2.55                                                       | -2.01                                           |                                                 |
| c2351            | <i>ybcL</i> | Putative phospholipid-binding protein                                                             | -2.17                                                       |                                                 |                                                 |
| c2388            |             | Transthyretin-like protein                                                                        | -2.89                                                       | -2.64                                           |                                                 |
| c2406            |             | Hypothetical protein                                                                              | -2.08                                                       |                                                 |                                                 |
| c2466            |             | Putative D-alanine--poly(phosphoribitol) ligase                                                   | -2.29                                                       |                                                 |                                                 |
| c2470            |             | Peptide/polyketide synthase                                                                       | -2.51                                                       |                                                 |                                                 |
| c2490            |             | Hypothetical protein                                                                              | -2.11                                                       |                                                 |                                                 |
| c2606            | <i>yegP</i> | Hypothetical protein                                                                              | -2.49                                                       | -2.49                                           |                                                 |
| c2640            | <i>yehE</i> | Hypothetical protein                                                                              | -2.40                                                       | -2.13                                           |                                                 |
| c2748            |             | Hypothetical protein                                                                              | -2.02                                                       |                                                 |                                                 |
| c2794            | <i>ais</i>  | Ais protein                                                                                       | -4.03                                                       | -3.74                                           |                                                 |
| c2797            | <i>yfbG</i> | Bifunctional UDP-glucuronic acid decarboxylase, UDP-4-amino-4-deoxy-L-arabinose formyltransferase | -3.20                                                       | -3.16                                           |                                                 |
| c2798            | <i>yfbH</i> | Putative deformylase                                                                              | -2.91                                                       | -2.71                                           |                                                 |
| c2800            |             | Putative 4-amino-4-deoxy-L-arabinose phosphoundercaprenol flippase                                | -2.65                                                       | -2.27                                           |                                                 |
| c2801            | <i>yfbJ</i> | Putative undecaprenyl-phosphate- $\alpha$ -L-Ara4N flippase                                       | -2.03                                                       |                                                 |                                                 |
| c2893            |             | Hypothetical protein                                                                              | -2.92                                                       | -2.35                                           |                                                 |
| c3207            | <i>ygaT</i> | Hypothetical protein                                                                              | -2.02                                                       | -2.63                                           |                                                 |
| c3221            | <i>ygaW</i> | Putative L-alanine exporter                                                                       | -2.15                                                       |                                                 |                                                 |

| <b>Locus tag</b> | <b>Gene</b> | <b>Description</b>                                             | <b><i>cpxA</i> mutant vs <i>cpxR</i> mutant<sup>a</sup></b> | <b><i>cpxA</i> mutant vs parent<sup>b</sup></b> | <b><i>cpxR</i> mutant vs parent<sup>c</sup></b> |
|------------------|-------------|----------------------------------------------------------------|-------------------------------------------------------------|-------------------------------------------------|-------------------------------------------------|
| c3316            | <i>ygbE</i> | Hypothetical protein, membrane protein                         | -2.04                                                       |                                                 |                                                 |
| c3394            |             | Hypothetical protein                                           | -2.28                                                       |                                                 |                                                 |
| c3557            |             | ShiA-like protein                                              | -2.82                                                       | -2.51                                           |                                                 |
| c3568            |             | Hypothetical protein                                           | -3.77                                                       | -3.17                                           |                                                 |
| c3599            |             | Hypothetical protein                                           | -2.39                                                       |                                                 |                                                 |
| c3601            |             | Hypothetical protein, membrane protein                         | -3.15                                                       | -2.67                                           |                                                 |
| c3682            |             | Hypothetical protein                                           | -2.00                                                       |                                                 |                                                 |
| c3797            | <i>glgS</i> | Glycogen synthesis protein GlgS                                | -2.91                                                       | -2.59                                           |                                                 |
| c3798            | <i>yqiJ</i> | Hypothetical protein, membrane protein                         | -2.24                                                       |                                                 |                                                 |
| c4051            | <i>mscL</i> | Large-conductance mechanosensitive channel                     | -3.13                                                       | -2.82                                           |                                                 |
| c4177            |             | Hypothetical protein                                           | -2.16                                                       |                                                 |                                                 |
| c4178            |             | Putative toxin RelE                                            | -2.09                                                       |                                                 |                                                 |
| c4250            |             | Hypothetical protein                                           | -3.19                                                       | -2.70                                           |                                                 |
| c4289            | <i>yhiM</i> | Putative inner membrane protein with a role in acid resistance | -7.72                                                       | -7.19                                           |                                                 |
| c4304            | <i>slp</i>  | Outer membrane protein Slp                                     | -5.41                                                       | -4.93                                           |                                                 |
| c4305            |             | Hypothetical protein                                           | -5.04                                                       | -4.57                                           |                                                 |
| c4320            | <i>hdeB</i> | Acid-resistance protein                                        | -7.36                                                       | -6.66                                           |                                                 |
| c4321            | <i>hdeA</i> | Acid-resistance protein                                        | -7.36                                                       | -6.74                                           |                                                 |
| c4326            | <i>yhiW</i> | Transcriptional regulator GadW                                 | -3.83                                                       | -3.58                                           |                                                 |
| c4327            | <i>yhiX</i> | DNA-binding transcriptional regulator GadX                     | -2.85                                                       | -2.63                                           |                                                 |
| c4366            | <i>yhjY</i> | Hypothetical protein                                           | -2.20                                                       |                                                 |                                                 |
| c4380            |             | Hypothetical protein, membrane protein                         | -2.04                                                       |                                                 |                                                 |
| c4517            |             | Hypothetical protein                                           | -2.39                                                       | -2.13                                           |                                                 |
| c4519            |             | Hypothetical protein                                           | -2.16                                                       |                                                 |                                                 |
| c4585            |             | Hypothetical protein                                           | -2.76                                                       | -2.52                                           |                                                 |
| c4650            |             | Hypothetical protein                                           | -2.24                                                       |                                                 |                                                 |
| c4686            | <i>yifE</i> | Hypothetical protein                                           | -2.49                                                       | -2.05                                           |                                                 |
| c4754            |             | Hypothetical protein                                           | -2.56                                                       | -2.34                                           |                                                 |
| c4755            |             | Putative HNH endonuclease                                      | -2.32                                                       |                                                 |                                                 |

| <b>Locus tag</b> | <b>Gene</b> | <b>Description</b>                                    | <b><i>cpxA</i> mutant vs <i>cpxR</i> mutant<sup>a</sup></b> | <b><i>cpxA</i> mutant vs parent<sup>b</sup></b> | <b><i>cpxR</i> mutant vs parent<sup>c</sup></b> |
|------------------|-------------|-------------------------------------------------------|-------------------------------------------------------------|-------------------------------------------------|-------------------------------------------------|
| c4874            | <i>yiiS</i> | Hypothetical protein                                  | -3.23                                                       | -3.37                                           |                                                 |
| c5000            |             | Hypothetical protein                                  | -2.09                                                       |                                                 |                                                 |
| c5121            | <i>adiY</i> | Regulatory protein                                    | -2.93                                                       |                                                 |                                                 |
| c5136            |             | Toxin of the GhoTS toxin-antitoxin system             | -2.62                                                       | -2.02                                           |                                                 |
| c5197            |             | Transposase                                           | -2.70                                                       | -2.62                                           |                                                 |
| c5205            |             | Hypothetical protein                                  | -2.02                                                       |                                                 |                                                 |
| c5212            |             | Hypothetical protein                                  | -2.09                                                       |                                                 |                                                 |
| c5387            |             | Putative 9-O-acetyl-N-acetylneuraminate esterase      | -2.56                                                       | -2.29                                           |                                                 |
| c5405            |             | Putative DNA replication/recombination/repair protein | -3.40                                                       | -3.33                                           |                                                 |
| c5458            |             | Hypothetical protein                                  | -3.16                                                       | -3.15                                           |                                                 |
| c5459            |             | Hypothetical protein                                  | -4.58                                                       | -4.26                                           |                                                 |
| c0173            |             | Hypothetical protein                                  | 6.10                                                        | 6.17                                            |                                                 |
| c0290            |             | Hypothetical protein                                  | 2.02                                                        |                                                 |                                                 |
| c0672            |             | Hypothetical protein                                  | 6.88                                                        | 5.06                                            |                                                 |
| c0673            | <i>entF</i> | Enterobactin synthase subunit F                       | 4.43                                                        | 4.61                                            |                                                 |
| c0678            | <i>ybdA</i> | Enterobactin exporter EntS                            | 2.71                                                        | 3.21                                            |                                                 |
| c0682            | <i>entB</i> | Isochorismatase                                       | 4.64                                                        | 4.71                                            |                                                 |
| c1233            |             | Putative CAAX amino protease                          |                                                             | 2.13                                            |                                                 |
| c1322            | <i>yceI</i> | Hypothetical protein                                  | 2.79                                                        | 2.30                                            |                                                 |
| c1452            |             | Hypothetical protein                                  |                                                             | 2.01                                            |                                                 |
| c1498            |             | Hypothetical protein                                  | 3.01                                                        | 2.61                                            |                                                 |
| c1499            |             | Capsid protein of prophage                            | 2.71                                                        | 2.50                                            |                                                 |
| c1563            | <i>ybcS</i> | Endopeptidase from lambdoid prophage DLP12            | 2.51                                                        |                                                 |                                                 |
| c1570            |             | DNA packaging protein of prophage                     |                                                             | 2.36                                            |                                                 |
| c1574            |             | Capsid protein of prophage                            | 3.06                                                        | 2.51                                            |                                                 |
| c1575            |             | Capsid protein of prophage                            | 2.69                                                        | 2.29                                            |                                                 |
| c1576            |             | Hypothetical protein                                  | 2.41                                                        |                                                 |                                                 |
| c1577            |             | Head-tail joining protein of prophage                 | 2.14                                                        |                                                 |                                                 |

| <b>Locus tag</b> | <b>Gene</b> | <b>Description</b>                                       | <b><i>cpxA</i> mutant vs <i>cpxR</i> mutant<sup>a</sup></b> | <b><i>cpxA</i> mutant vs parent<sup>b</sup></b> | <b><i>cpxR</i> mutant vs parent<sup>c</sup></b> |
|------------------|-------------|----------------------------------------------------------|-------------------------------------------------------------|-------------------------------------------------|-------------------------------------------------|
| c1578            |             | Tail fiber component Z of prophage                       | 2.11                                                        |                                                 |                                                 |
| c1579            |             | Tail component of prophage                               | 2.76                                                        | 2.46                                            |                                                 |
| c1583            |             | Tail component of prophage                               | 2.46                                                        |                                                 |                                                 |
| c1584            |             | Tail component of prophage                               | 2.20                                                        |                                                 |                                                 |
| c1596            |             | Hypothetical protein                                     |                                                             | 2.07                                            |                                                 |
| c1675            |             | Putative small toxic polypeptide                         | 4.06                                                        | 3.93                                            |                                                 |
| c1849            | <i>ycg</i>  | Glucan biosynthesis protein D                            | 2.41                                                        |                                                 |                                                 |
| c1860            | <i>yncJ</i> | Hypothetical protein                                     | 5.93                                                        | 6.30                                            |                                                 |
| c1963            | <i>ydeH</i> | Putative diguanylate cyclase                             | 3.31                                                        | 3.32                                            |                                                 |
| c2142            |             | Hypothetical protein                                     | 2.99                                                        | 3.08                                            |                                                 |
| c2257            |             | Hypothetical protein                                     | 2.67                                                        | 3.07                                            |                                                 |
| c2258            | <i>yebE</i> | Hypothetical protein                                     | 6.44                                                        | 5.65                                            |                                                 |
| c2423            |             | AraC type regulator                                      | 2.97                                                        | 3.07                                            |                                                 |
| c3004            | <i>purC</i> | Phosphoribosylaminoimidazole-succinocarboxamide synthase |                                                             | 2.37                                            |                                                 |
| c3030            |             | SinI-like protein                                        | 2.82                                                        | 2.83                                            |                                                 |
| c3031            |             | SinH-like protein                                        | 2.42                                                        | 2.70                                            |                                                 |
| c3080            | <i>purL</i> | Phosphoribosylformylglycinamide synthase                 | 2.81                                                        | 3.17                                            |                                                 |
| c3104            |             | Hypothetical protein                                     |                                                             | 2.18                                            |                                                 |
| c3121            | <i>tyrA</i> | Bifunctional chorismate mutase/prephenate dehydrogenase  | 3.68                                                        | 3.48                                            |                                                 |
| c3127            | <i>rplS</i> | 50S ribosomal protein L19                                |                                                             | 2.13                                            |                                                 |
| c3177            | <i>cspI</i> | Cold shock-like protein CspI                             | 4.53                                                        | 3.37                                            |                                                 |
| c3178            |             | Hypothetical protein                                     | 4.83                                                        | 3.39                                            |                                                 |
| c3236            | <i>ygaH</i> | Putative L-valine efflux transporter                     | 3.27                                                        | 2.77                                            |                                                 |
| c3285            | <i>hycA</i> | Formate hydrogenlyase regulatory protein HycA            |                                                             | 2.61                                            |                                                 |
| c3627            | <i>iucA</i> | Putative aerobactin synthase                             |                                                             | 2.00                                            |                                                 |
| c3782            | <i>ygiA</i> | Hypothetical protein                                     | 2.38                                                        |                                                 |                                                 |
| c3784            | <i>ygiC</i> | Hypothetical protein                                     | 3.34                                                        |                                                 |                                                 |

| <b>Locus tag</b> | <b>Gene</b> | <b>Description</b>                                                                        | <b><i>cpxA</i> mutant vs <i>cpxR</i> mutant<sup>a</sup></b> | <b><i>cpxA</i> mutant vs parent<sup>b</sup></b> | <b><i>cpxR</i> mutant vs parent<sup>c</sup></b> |
|------------------|-------------|-------------------------------------------------------------------------------------------|-------------------------------------------------------------|-------------------------------------------------|-------------------------------------------------|
| c3854            | <i>yqjB</i> | Putative component of osmoregulatory two-component signal transduction system             | 3.40                                                        | 3.20                                            |                                                 |
| c3911            | <i>yhbU</i> | Putative protease YhbU                                                                    | 2.15                                                        |                                                 |                                                 |
| c3912            | <i>yhbV</i> | Hypothetical protein                                                                      | 2.21                                                        |                                                 |                                                 |
| c3973            | <i>glbB</i> | Glutamate synthase subunit alpha                                                          | 2.83                                                        | 2.48                                            |                                                 |
| c3978            | <i>nanT</i> | Putative sialic acid transporter                                                          | 3.07                                                        | 2.66                                            |                                                 |
| c4077            | <i>rpmC</i> | 50S ribosomal protein L29                                                                 | 2.39                                                        | 2.59                                            |                                                 |
| c4078            |             | Hypothetical protein                                                                      |                                                             | 2.65                                            |                                                 |
| c4081            | <i>rpsC</i> | Hypothetical protein                                                                      | 2.59                                                        | 2.74                                            |                                                 |
| c4082            | <i>rplV</i> | 50S ribosomal protein L22                                                                 | 2.75                                                        | 3.02                                            |                                                 |
| c4086            |             | Hypothetical protein                                                                      | 2.58                                                        | 3.34                                            |                                                 |
| c4088            |             | Hypothetical protein                                                                      |                                                             | 2.24                                            |                                                 |
| c4089            | <i>rplD</i> | 50S ribosomal protein L4                                                                  | 2.83                                                        | 3.09                                            |                                                 |
| c4091            | <i>rplC</i> | 50S ribosomal protein L3                                                                  | 2.77                                                        | 3.05                                            |                                                 |
| c4185            | <i>feoA</i> | Ferrous iron transport protein A                                                          | 2.17                                                        | 2.14                                            |                                                 |
| c4187            | <i>yhgG</i> | Putative DNA-binding transcriptional regulator                                            |                                                             | 2.24                                            |                                                 |
| c4310            |             | Hypothetical protein                                                                      | 3.42                                                        | 3.71                                            |                                                 |
| c4312            |             | Hypothetical protein                                                                      | 4.16                                                        | 3.36                                            |                                                 |
| c4315            | <i>chuX</i> | Putative heme utilization carrier protein                                                 | 5.57                                                        | 5.56                                            |                                                 |
| c4365            | <i>yhjX</i> | Putative transporter                                                                      | 5.52                                                        | 5.68                                            |                                                 |
| c4376            |             | Hypothetical protein                                                                      | 2.20                                                        | 2.04                                            |                                                 |
| c4693            | <i>ilvD</i> | Dihydroxy-acid dehydratase                                                                | 2.73                                                        | 2.09                                            |                                                 |
| c4804            | <i>dsbA</i> | Periplasmic protein disulfide isomerase I                                                 | 2.45                                                        | 2.27                                            |                                                 |
| c4819            | <i>glnA</i> | Glutamine synthetase                                                                      | 3.27                                                        | 2.95                                            |                                                 |
| c4942            |             | Hypothetical protein                                                                      | 2.19                                                        | 2.39                                            |                                                 |
| c4964            | <i>purH</i> | Bifunctional phosphoribosylaminoimidazolecarboxamide formyltransferase-IMP cyclohydrolase | 2.48                                                        | 3.25                                            |                                                 |
| c5055            |             | Hypothetical protein                                                                      |                                                             | 3.05                                            |                                                 |
| c5276            | <i>yjfN</i> | Hypothetical protein                                                                      | 6.26                                                        | 5.93                                            |                                                 |

| <b>Locus tag</b> | <b>Gene</b> | <b>Description</b>        | <b><i>cpxA</i> mutant vs <i>cpxR</i> mutant<sup>a</sup></b> | <b><i>cpxA</i> mutant vs parent<sup>b</sup></b> | <b><i>cpxR</i> mutant vs parent<sup>c</sup></b> |
|------------------|-------------|---------------------------|-------------------------------------------------------------|-------------------------------------------------|-------------------------------------------------|
| c5292            | <i>rpsR</i> | 30S ribosomal protein S18 | 2.07                                                        |                                                 |                                                 |
| c5447            |             | Hypothetical protein      | 2.42                                                        | 2.29                                            |                                                 |
| c5448            |             | Hypothetical protein      |                                                             | 2.12                                            |                                                 |
| c5463            | <i>yjiI</i> | Hypothetical protein      | 2.47                                                        | 2.29                                            |                                                 |

<sup>a</sup> Genes differentially expressed in CFT073Δ*cpxA*::*cat* vs CFT073Δ*cpxR*::*cat*.

<sup>b</sup> Genes differentially expressed in CFT073Δ*cpxA*::*cat* vs CFT073.

<sup>c</sup> Genes differentially expressed in CFT073Δ*cpxR*::*cat* vs CFT073.

Values indicate fold change in expression of gene transcription; (-) minus sign indicates downregulation.



**Table S3** Promoters of differentially regulated genes containing a consensus CpxR binding logo

| Locus tag | Gene        | Motif <sup>a</sup> | Strand <sup>b</sup> | Score <sup>c</sup> | Position <sup>d</sup> |
|-----------|-------------|--------------------|---------------------|--------------------|-----------------------|
| c0040     | <i>carA</i> | GTAAATCAATGCAAA    | -                   | 8.36735            | -45, -31              |
| c0197     | <i>htrA</i> | GTAAATTACCGTCAG    | +                   | 15.6122            | -269, -255            |
| c0290     |             | GCAAAAAACCGTAAA    | -                   | 17.7347            | -108, -94             |
| c0605     | <i>ybaS</i> | GTAAAAGTCCGTAAA    | +                   | 17.7347            | -171, -157            |
| c0611     | <i>ybbL</i> | GTAAAAATCAGAAAA    | +                   | 12.4592            | -23, -9               |
| c0652     | <i>ompT</i> | GTAAACCTTGCAAG     | +                   | 7.34694            | -347, -333            |
| c0924     | <i>dacC</i> | GCAAAAAAATGACAC    | +                   | 11.4592            | -144, -130            |
| c0926     | <i>ybjG</i> | GTAAACTGGGTAAA     | -                   | 8.35714            | -79, -65              |
| c1009     | <i>aqpZ</i> | GCAATGTCTGAAAA     | +                   | 9.70408            | -327, -313            |
| c1011     | <i>ybjD</i> | GCAATGTCTGAAAA     | -                   | 9.70408            | -106, -92             |
| c1034     | <i>ycaC</i> | GCAAAGCATGACAG     | +                   | 10.8571            | -247, -233            |
| c1110     | <i>yccA</i> | GTAAAGATGGGTAAA    | +                   | 16.9082            | -84, -70              |
| c1155     |             | GCAAAGAAAAGTAAA    | -                   | 15.4694            | -116, -102            |
| c1204     |             | TCAAAAAAATGTCAA    | +                   | 7.21429            | -401, -387            |
| c1418     |             | GTAACGCTATGTAAG    | +                   | 8.20408            | -61, -47              |
| c1625     | <i>ycgJ</i> | GCAAAAAATGGAAAG    | -                   | 12.8469            | -201, -187            |
| c1663     | <i>yehH</i> | GTAAAGTATAGACAA    | -                   | 11.9184            | -70, -56              |
| c1676     | <i>chaA</i> | ATAAAAAATCGTAAA    | -                   | 9.57143            | -413, -399            |
| c1676     | <i>chaA</i> | GTAAAAATTCGTAAA    | +                   | 17.7449            | -14, 0                |
| c1676     | <i>chaA</i> | GTAAAAATCGACAG     | +                   | 14.5918            | -33, -19              |
| c1717     | <i>tonB</i> | ATAAAGTAAGGTCAA    | +                   | 7.7449             | -78, -64              |
| c1849     | <i>ydeg</i> | GTAAAATCAGGCAAA    | -                   | 7.65306            | -198, -184            |
| c1919     |             | GCAAAGCATCGTTAA    | -                   | 7.92857            | -435, -421            |
| c1963     | <i>ydeH</i> | GCAAAATTACGTCAA    | -                   | 15.7449            | -59, -45              |
| c1992     | <i>ydgF</i> | GTAAAGAAGTGAAAA    | +                   | 15.898             | -330, -316            |
| c1993     | <i>ydgG</i> | GTAAAGAAGTGAAAA    | -                   | 15.898             | -95, -81              |
| c2011     | <i>hdhA</i> | GCAAAGCGGGAAAG     | +                   | 11.9898            | -339, -325            |
| c2143     | <i>spy</i>  | GTAAAACAATGAAAG    | -                   | 16.7245            | -119, -105            |
| c2201     |             | GCAAAGCAACGTATA    | +                   | 8.60204            | -191, -177            |
| c2238     | <i>htpX</i> | GCAAGATGCCGTAAA    | +                   | 6.94898            | -147, -133            |
| c2253     | <i>yobB</i> | GTAAAGAAAGTGTAAAC  | -                   | 8.14286            | -90, -76              |
| c2315     | <i>yecI</i> | GTAAAAATATATAAA    | +                   | 8.71429            | -194, -180            |
| c2351     | <i>ybcL</i> | ATAAAGTAGGGTAAG    | -                   | 8.42857            | -173, -159            |
| c2352     | <i>emrE</i> | GCAAAGCGAAGACAA    | -                   | 10.0306            | -190, -176            |
| c2411     |             | ATAAAACAACGTACA    | +                   | 7.83673            | -284, -270            |
| c2470     |             | GCAAAAACATGTAAG    | -                   | 15.5816            | -198, -184            |
| c2471     |             | GCAAAAACATGTAAG    | +                   | 15.5816            | -429, -415            |
| c2794     | <i>ais</i>  | GAAAAAAAATGTTCAG   | -                   | 9.43878            | -286, -272            |
| c2915     | <i>ddg</i>  | GTAAAGACTAGTCAG    | -                   | 12.6327            | -123, -109            |
| c3217     | <i>ygaP</i> | GTAAATGAGAGTAAA    | -                   | 15.0612            | -394, -380            |
| c3221     | <i>ygaW</i> | GAAAAATAAAGGTAAA   | +                   | 7.58163            | -252, -238            |
| c3460     | <i>ygfO</i> | GGAAATCGGTGTAAG    | +                   | 7.13265            | -231, -217            |
| c3682     |             | GTAAACGAAGGTAAAG   | +                   | 16.449             | -268, -254            |
| c3863     | <i>yhaJ</i> | GTAAAGAGAGGTCAA    | -                   | 16.2041            | -98, -84              |
| c4011     | <i>accB</i> | GTGAAAAGCTGTAAA    | -                   | 8.55102            | -447, -433            |
| c4081     | <i>rpsC</i> | GAAAAACTGCGTAAG    | -                   | 9.40816            | -266, -252            |
| c4138     | <i>ppiA</i> | GTAAAATTAGGTAAA    | +                   | 17.7551            | -91, -77              |
| c4141     | <i>nirB</i> | GCAAAAAACAGACAA    | -                   | 11.0408            | -175, -161            |
| c4323     | <i>yhiE</i> | GCAAAAAAATGAACC    | -                   | 9.56122            | -419,                 |
| c4607     | <i>ibpA</i> | GCAAAAAAAGTCCG     | +                   | 11.7347            | -154                  |
| c4803     | <i>yihE</i> | GTAAAAGCTTGTAAAG   | +                   | 16.1633            | -80, -66              |

| <b>Locus tag</b> | <b>Gene</b> | <b>Motif<sup>a</sup></b> | <b>Strand<sup>b</sup></b> | <b>Score<sup>c</sup></b> | <b>Position<sup>d</sup></b> |
|------------------|-------------|--------------------------|---------------------------|--------------------------|-----------------------------|
| c4864            | <i>cpxR</i> | GTAAAACAACGTAAA          | +                         | 20.6122                  | -69, -55                    |
| c4864            | <i>cpxR</i> | GCAAACATGCGTCAG          | +                         | 13.0204                  | -89, -75                    |
| c4865            | <i>cpxP</i> | GTAAAACAACGTAAA          | -                         | 20.6122                  | -94, -80                    |
| c4865            | <i>cpxP</i> | GCAAACATGCGTCAG          | -                         | 13.0204                  | -74, -60                    |
| c4964            | <i>purH</i> | GTAAAAAAGGTATAAA         | -                         | 8.86735                  | -240, -226                  |
| c5081            |             | GTAATACCGCGTAAA          | +                         | 8.64286                  | -377, -363                  |
| c5247            | <i>psd</i>  | GTAAAAACGCGTAAA          | +                         | 17.9082                  | -134, -120                  |
| c5276            | <i>yjfN</i> | GCAAAGCAATGTAAA          | -                         | 17.7449                  | -97, -83                    |
| c5393            | <i>fimA</i> | GAAAAAATACGTAAC          | -                         | 7.27551                  | -346, -332                  |
| c5458            |             | GCAAAGCCAGTCCG           | +                         | 8.43878                  | -289, -275                  |
| c5463            | <i>yjlI</i> | GCAAAACTCTGAAAG          | -                         | 12.551                   | -440, -426                  |
| c5479            | <i>slt</i>  | GTAAAAAAGTGTCCG          | +                         | 15.4694                  | -106, -92                   |
| c5479            | <i>slt</i>  | GTAACGTGGCGTAAA          | +                         | 8.65306                  | -92, -78                    |

<sup>a</sup> Corresponds to the motif with the highest match score.

<sup>b</sup> +Template strand; -Complementary strand.

<sup>c</sup> Match score is the sum of individual position scores from each letter in the sequence.

<sup>d</sup> Position of the motif is relative to the position of the transcriptional start site for the gene/operon.

**Table S4** qRT-PCR validation of RNA-Seq data

| Expression Level | Gene        | RNA-Seq <sup>a</sup> | qRT-PCR <sup>b</sup> |
|------------------|-------------|----------------------|----------------------|
| Low              | <i>cusB</i> | -4.4                 | -22.7                |
|                  | <i>fimH</i> | -2.4                 | -5.0                 |
|                  | <i>nikC</i> | 2.4                  | 13.6                 |
|                  | <i>fepC</i> | 4.0                  | 11.8                 |
| Medium           | <i>sfaD</i> | -4.9                 | -84.1                |
|                  | <i>phoU</i> | -3.7                 | -20.0                |
|                  | <i>dsbA</i> | 2.4                  | 8.5                  |
|                  | <i>ppiA</i> | 3.7                  | 14.9                 |
|                  | <i>chuW</i> | 5.8                  | 408.9                |
| High             | <i>gadA</i> | -8.1                 | -620.5               |
|                  | <i>oppA</i> | -2.1                 | -4.3                 |
|                  | <i>glnA</i> | 3.3                  | 14.1                 |
|                  | <i>cpxP</i> | 5.2                  | 46.5                 |

<sup>a</sup> Fold change in the expression of select genes in the *cpxA* mutant relative to the *cpxR* mutant from RNA-Seq.

<sup>b</sup> Fold change in the expression of select genes in the *cpxA* mutant relative to the *cpxR* mutant from qRT-PCR. The expression levels of target genes were normalized to that of *gapA*. The data represent the mean of four independent experiments.

(-) minus sign indicates downregulation of gene expression in the *cpxA* mutant relative to the *cpxR* mutant.

**Table S5** Primers used in this study

| Primer (gene)                 | Purpose              | 5' to 3' sequence                                          |
|-------------------------------|----------------------|------------------------------------------------------------|
| P1                            | <i>cpxR</i> deletion | GACGTAATTTCTGCCTCGGAGGTATTTAAACAATGGTGTAGGCTGGAGCTGCTTC    |
| P2                            | <i>cpxR</i> deletion | GATGGCGAAGATGCGCGCGGTTAAGCTGCCTATCAATGGGAATTAGCCATGGTCC    |
| P3                            | <i>cpxA</i> deletion | CGTGGTCGCGGCTATCTGATGGTTTCTGCTTCATGATAGTGTAGGCTGGAGCTGCTTC |
| P4                            | <i>cpxA</i> deletion | TAAACGCCTTATCCTGCCTACAAATGCGGAGTTTAATGGGAATTAGCCATGGTCC    |
| P5                            | SDM <sup>a</sup>     | GTCGCCAGGAAGCCAGCTTCGACGGGCAAAC                            |
| P6                            | SDM                  | GTTTGCCCGTCTGAAGCTGGCTTCTCTGGCGAC                          |
| P7                            | SDM                  | GTAATGCTCTGCGTTATCCCATACGAAGATTG                           |
| P8                            | SDM                  | CAATCTTCGTATGGGAATAACGCAGAGCATTAC                          |
| P9 ( <i>cusB</i> F)           | qRT-PCR <sup>b</sup> | GCTTACCGTGGGCGATAAA                                        |
| P10 ( <i>cusB</i> R)          | qRT-PCR              | TAAATACTCACTCTGCGCTTCC                                     |
| P11 ( <i>fimH</i> F)          | qRT-PCR              | CTTATGGCGGCGTGTATCT                                        |
| P12 ( <i>fimH</i> R)          | qRT-PCR              | CGGCTTATCCGTTCTCGAATTA                                     |
| P13 ( <i>nikC</i> F)          | qRT-PCR              | CGCGTCTGATATGTTTATG                                        |
| P14 ( <i>nikC</i> R)          | qRT-PCR              | GACAGGGCGATGGCTATAAT                                       |
| P15 ( <i>fepC</i> F)          | qRT-PCR              | AACCGCGAGAAAGGCTATAC                                       |
| P16 ( <i>fepC</i> R)          | qRT-PCR              | CTTCCCGAATGCAATCAAA                                        |
| P17 ( <i>sfaD</i> F)          | qRT-PCR              | AGAACTGGGTGCATCTTACC                                       |
| P18 ( <i>sfaD</i> R)          | qRT-PCR              | CATACCTGTCCATTTGCCTTT                                      |
| P19 ( <i>phoU</i> F)          | qRT-PCR              | GTCATCGAAGGCGACAAGAA                                       |
| P20 ( <i>phoU</i> R)          | qRT-PCR              | GCTGACGTTTGGCGATAATG                                       |
| P21 ( <i>dsbA</i> F)          | qRT-PCR              | AGTCACAGTCCCGCTGTTT                                        |
| P22 ( <i>dsbA</i> R)          | qRT-PCR              | GCGTCGTACTTTCACCTTT                                        |
| P23 ( <i>ppiA</i> F)          | qRT-PCR              | CCACCAGCCAGTTCTTTATCA                                      |
| P24 ( <i>ppiA</i> R)          | qRT-PCR              | GCCTTTCACCACTTTACCAAATAC                                   |
| P25 ( <i>chuW</i> F)          | qRT-PCR              | ACGCGAACGCAATCTCTATAA                                      |
| P26 ( <i>chuW</i> R)          | qRT-PCR              | GTTTCGTTTCATCCAGGAGTACC                                    |
| P27 ( <i>gadA</i> F)          | qRT-PCR              | CAGGCAAACCAACGATAAAC                                       |
| P28 ( <i>gadA</i> R)          | qRT-PCR              | CATAGGGATCTCACGCAACTC                                      |
| P29 ( <i>oppA</i> F)          | qRT-PCR              | TCTCGGCGTGAAAGCTATTG                                       |
| P30 ( <i>oppA</i> R)          | qRT-PCR              | CGGTGAAGTTGATGGGTGAA                                       |
| P31 ( <i>glnA</i> F)          | qRT-PCR              | TGTTCCGGTGATAACGGTTCC                                      |
| P32 ( <i>glnA</i> R)          | qRT-PCR              | GTTTCAGACAGACCTGCGTATT                                     |
| P33 ( <i>cpxP</i> F)          | qRT-PCR              | CGCTGGCAGTCAGTTCATTA                                       |
| P34 ( <i>cpxP</i> R)          | qRT-PCR              | AACATATGGCTCTGCGTACTG                                      |
| P35 ( <i>cpxR</i> F)          | qRT-PCR              | ACCGACACTGGAAGTTGATG                                       |
| P36 ( <i>cpxR</i> R)          | qRT-PCR              | CCAGCAAATAGAGCAGGGTAA                                      |
| P37 ( <i>cpxA</i> F)          | qRT-PCR              | CCGATCATCCGCAGAAGAAA                                       |
| P38 ( <i>cpxA</i> R)          | qRT-PCR              | GGCCGGACGAATCAGATAAA                                       |
| P39 ( <i>gapA</i> F)          | qRT-PCR              | CGGTACCGTTGAAGTGAAAGA                                      |
| P40 ( <i>gapA</i> R)          | qRT-PCR              | CTAACCTGAAATGGGACGAAGT                                     |
| P41 ( <i>fimA</i> promoter F) | Reporter construct   | GGAAGATCTTTGCCGATTATGGGAAAGA                               |
| P42 ( <i>fimA</i> promoter R) | Reporter construct   | GGAAGATCTTTTGTGTTTGTCAACGAGTTG                             |
| P43 ( <i>hlyA</i> promoter F) | Reporter construct   | GGAAGATCTATATTTTAGAGTATACTTGCGCACC                         |
| P44 ( <i>hlyA</i> promoter R) | Reporter construct   | GGAAGATCTTGCAGGTGGCAGGTAAAAAAAAG                           |
| P45 ( <i>gfp</i> R)           | Reporter construct   | CCTTACCCTCTCCACTGACAG                                      |

<sup>a</sup>SDM, site directed mutagenesis; <sup>b</sup>qRT-PCR, quantitative real time polymerase chain reaction; underline indicates mutagenic

nucleotide; boldfaced text indicates regions corresponding to restriction enzyme sites as mentioned in the text.
